# Supplementary material for: Availability of Evidence for Predictive Machine Learning Algorithms in Primary Care: A Systematic Review
Source: PubMed Central journal article supplement (PMC11393722; doi:10.1001/jamanetworkopen.2024.32990), 2024-09-12
Supplement: jamanetwopen-e2432990-s001.pdf [file jamanetwopen-e2432990-s001.pdf]

## Supplemental Online Content

Rakers MM, van Buchem MM, Kucenko S, et al. Availability of evidence for predictive machine learning algorithms in primary care: a systematic review. *JAMA Netw Open*. 2024;7(9):e2432990. doi:10.1001/jamanetworkopen.2024.32990

**eAppendix 1.** Search Strategies Used Up to July 7, 2023

**eAppendix 2.** Selection Process

**eAppendix 3.** Online Questionnaire for Information From Authors and Commercial Product Owners

**eTable 1.** The Evidence Requirements Established per Life Cycle Phase as Described in the Dutch AIPA Guideline

**eFigure.** Flowchart of Literature Inclusion for Assessment of the Six Phases

**eTable 2.** Overview of Publication Characteristics per Predictive ML Algorithm

**eTable 3.** Overview of the Availability of Evidence per Predictive ML Algorithm

This supplemental material has been provided by the authors to give readers additional information about their work.

## eAppendix 1 – Search strategies used up to July 7, 2023

The searches were conducted on the following dates:

- Initial search: April 8, 2021
  - Updated search: May 20, 2022
  - Second updated search: July 7, 2023
- P (population): Treated in the primary care setting in any country/the Netherlands.
  - I (intervention): AI application in pilot phase or implemented in practice use (MDR application p.e.)
  - C (comparison): No intervention, standard care, another computer science intervention or any other comparator.
  - O (outcomes): any outcome reported.

| Database | Query                                                                                                                                                                                                                                                                                                                                                                                                                                                                                                                                                                                                                                                                                                                                                                                                                                                                                                                                                                                                                                                                                                                                                                                                                                                                                                                                                                                                                                                                                                                                                                                                                                                                                                                                                                                                                                                                                                                                                                                                                                                                                                                                                                                                                                                                                                                                                                                                                                                                                                                                                                                                                                                                                                                                                                                                                                                                                                                                                                                                                                                                                                                                                        |
|----------|--------------------------------------------------------------------------------------------------------------------------------------------------------------------------------------------------------------------------------------------------------------------------------------------------------------------------------------------------------------------------------------------------------------------------------------------------------------------------------------------------------------------------------------------------------------------------------------------------------------------------------------------------------------------------------------------------------------------------------------------------------------------------------------------------------------------------------------------------------------------------------------------------------------------------------------------------------------------------------------------------------------------------------------------------------------------------------------------------------------------------------------------------------------------------------------------------------------------------------------------------------------------------------------------------------------------------------------------------------------------------------------------------------------------------------------------------------------------------------------------------------------------------------------------------------------------------------------------------------------------------------------------------------------------------------------------------------------------------------------------------------------------------------------------------------------------------------------------------------------------------------------------------------------------------------------------------------------------------------------------------------------------------------------------------------------------------------------------------------------------------------------------------------------------------------------------------------------------------------------------------------------------------------------------------------------------------------------------------------------------------------------------------------------------------------------------------------------------------------------------------------------------------------------------------------------------------------------------------------------------------------------------------------------------------------------------------------------------------------------------------------------------------------------------------------------------------------------------------------------------------------------------------------------------------------------------------------------------------------------------------------------------------------------------------------------------------------------------------------------------------------------------------------------|
| AI Terms | (((("Artificial Intelligence"[majr] OR "Artificial Intelligence"[ti] OR "Biological Ontologies"[ti] OR "Biological Ontology"[ti] OR "Computational Intelligence"[ti] OR "Computer Heuristics"[ti] OR "Computer Intelligence"[ti] OR "Computer Neural Network"[ti] OR "Computer Neural Networks"[ti] OR "Computer Reasoning"[ti] OR "Computer Vision System"[ti] OR "Computer Vision Systems"[ti] OR "Deep Learning"[ti] OR "Machine Intelligence"[ti] OR "Machine Learning"[ti] OR "Natural Language Processing"[ti] OR "Robotic"[ti] OR "Robotics"[ti] OR "Supervised Machine Learning"[ti] OR "Support Vector Machine"[ti] OR "Support Vector Machines"[ti] OR "Unsupervised Machine Learning"[ti] OR "Neural Network"[ti] OR "Neural Networks"[ti] OR "Neural Network*" [ti] OR "Data Mining"[majr] OR "Data Mining"[ti] OR "text mining"[ti] OR "Multifactor Dimensionality Reduction"[ti] OR "Big Data"[majr] OR "Big Data"[ti] OR "Data Science"[majr] OR "Data Science"[ti] OR "Data Sciences"[ti] OR "Data Analytics"[ti] OR "Data driven"[ti] OR "Datasets as Topic"[majr] OR "Bayesian Network"[ti] OR "Bayes Network"[ti] OR "Bayesian Networks"[ti] OR "Bayes Networks"[ti] OR "Bayesian Network"[ti] OR "Bayes Network"[ti] OR "Bayesian Networks"[ti] OR "Bayes Networks"[ti] OR "Bayes Theorem"[majr] OR "Bayes"[ti] OR "Bayesian"[ti]) AND ("Primary Health Care"[Mesh] OR "Primary Care Nursing"[Mesh] OR "Physicians, Primary Care"[Mesh] OR "Physicians, Family"[Mesh] OR "General Practitioners"[Mesh] OR "Family Practice"[Mesh] OR "General Practice"[Mesh] OR "primary healthcare"[tw] OR "Family Practice"[tw] OR "General Practice"[tw] OR "primary care"[tw] OR "primary health care"[tw] OR "Family Physician"[tw] OR "Family Physicians"[tw] OR "Family Doctor"[tw] OR "Family Doctors"[tw] OR "General Practitioner"[tw] OR "General Practitioners"[tw] OR "General Practice Physician"[tw] OR "General Practice Physicians"[tw] OR "Primary Medical Care"[tw] OR "Family Healthcare"[tw] OR "Family Health Care"[tw] OR "Family Medicine"[tw] OR "Nurse Practitioner"[tw] OR "Nurse Practitioners"[tw] OR "Family Nurse"[tw] OR "Family Nurses"[tw] OR "Family Nursing"[tw] OR "Community Medicine"[Mesh] OR "Community Medicine"[tw] OR "Community Practice"[tw] OR "community physician"[tw] OR "community physicians"[tw] OR "community doctor"[tw] OR "community doctor"[tw] OR "community practitioner"[tw] OR "community practitioner"[tw] OR "community nurse"[tw] OR "community nurses"[tw] OR "community nursing"[tw]) AND ("Program Evaluation"[Mesh] OR "Evaluation Study"[ptyp] OR "Evaluation Studies as Topic"[Mesh] OR "Process Assessment, Health Care"[Mesh] OR "Implementation Science"[Mesh] OR "Health Plan Implementation"[Mesh] OR "Pilot Projects"[Mesh] OR "Preliminary Data"[Mesh] OR "Adopt*" [tw] OR "Adoption"[tw] OR "Assess*" [tw] OR "Assessment"[tw] OR "Evaluat*" [tw] OR "Evaluation studies"[tw] OR "Evaluation study"[tw] OR "Evaluation*" [tw] OR "Implement*" [tw] OR "Implementation"[tw] OR "pilot phase"[tw] OR "Pilot Studies"[tw] OR "Pilot Study"[tw] OR "Preliminary Data"[tw] OR |

| Database | Query                                                                                                                                                                                                                                                                                                                                                                                                                                                                                                                                                                                                                                                                                                                                                                                                                                                                                                                                                                                                                                                                                                                                                                                                                                                                                                                                                                                                                                                                                                                                                                                                                                                                                                                                                                                                                                                                                                                                                                                                                                                                                                                                                                                                                                                                                                                                                                                                                                                                                                                                                                                                                                                                                                                                                                                                                                                                                                                                                                                                                                                                                                                                                                                                                                                                                                                                                                                                                                                                                                                                                                                |
|----------|--------------------------------------------------------------------------------------------------------------------------------------------------------------------------------------------------------------------------------------------------------------------------------------------------------------------------------------------------------------------------------------------------------------------------------------------------------------------------------------------------------------------------------------------------------------------------------------------------------------------------------------------------------------------------------------------------------------------------------------------------------------------------------------------------------------------------------------------------------------------------------------------------------------------------------------------------------------------------------------------------------------------------------------------------------------------------------------------------------------------------------------------------------------------------------------------------------------------------------------------------------------------------------------------------------------------------------------------------------------------------------------------------------------------------------------------------------------------------------------------------------------------------------------------------------------------------------------------------------------------------------------------------------------------------------------------------------------------------------------------------------------------------------------------------------------------------------------------------------------------------------------------------------------------------------------------------------------------------------------------------------------------------------------------------------------------------------------------------------------------------------------------------------------------------------------------------------------------------------------------------------------------------------------------------------------------------------------------------------------------------------------------------------------------------------------------------------------------------------------------------------------------------------------------------------------------------------------------------------------------------------------------------------------------------------------------------------------------------------------------------------------------------------------------------------------------------------------------------------------------------------------------------------------------------------------------------------------------------------------------------------------------------------------------------------------------------------------------------------------------------------------------------------------------------------------------------------------------------------------------------------------------------------------------------------------------------------------------------------------------------------------------------------------------------------------------------------------------------------------------------------------------------------------------------------------------------------------|
|          | "Process Assess*"[tw] OR "Process Assessment"[tw] OR "Process Measure"[tw] OR "Process Measures"[tw] OR "Program Appropria*"[tw] OR "Program Appropriateness"[tw] OR "Program Assess*"[tw] OR "Program Assessment"[tw] OR "Program Effectiv*"[tw] OR "Program Effectiveness"[tw] OR "Program Evaluat*"[tw] OR "Program Evaluation"[tw] OR "Program Sustain*"[tw] OR "Program Sustainability"[tw] OR "Programme Appropria*"[tw] OR "Programme Appropriateness"[tw] OR "Programme Assess*"[tw] OR "Programme Assessment"[tw] OR "Programme Effectiv*"[tw] OR "Programme Effectiveness"[tw] OR "Programme Evaluat*"[tw] OR "Programme Evaluation"[tw] OR "Programme Sustain*"[tw] OR "Programme Sustainability"[tw]))                                                                                                                                                                                                                                                                                                                                                                                                                                                                                                                                                                                                                                                                                                                                                                                                                                                                                                                                                                                                                                                                                                                                                                                                                                                                                                                                                                                                                                                                                                                                                                                                                                                                                                                                                                                                                                                                                                                                                                                                                                                                                                                                                                                                                                                                                                                                                                                                                                                                                                                                                                                                                                                                                                                                                                                                                                                                   |
| Embase   | (((exp *"Artificial Intelligence"/ OR exp *"machine learning"/ OR "Artificial Intelligence".ti OR "Biological Ontologies".ti OR "Biological Ontology".ti OR "Computational Intelligence".ti OR "Computer Heuristics".ti OR "Computer Intelligence".ti OR "Computer Neural Network".ti OR "Computer Neural Networks".ti OR "Computer Reasoning".ti OR "Computer Vision System".ti OR "Computer Vision Systems".ti OR "Deep Learning".ti OR "Machine Intelligence".ti OR "Machine Learning".ti OR "Natural Language Processing".ti OR "Robotic".ti OR "Robotics".ti OR "Supervised Machine Learning".ti OR "Support Vector Machine".ti OR "Support Vector Machines".ti OR "Unsupervised Machine Learning".ti OR "Knowledge Acquisition".ti OR "Knowledge Representation".ti OR "Neural Network".ti OR "Neural Networks".ti OR "Neural Network*".ti OR "Data Mining"/ OR "Data Mining".ti OR "text mining".ti OR "Multifactor Dimensionality Reduction".ti OR "Big Data"/ OR "Big Data".ti OR "Data Science"/ OR "Data Science".ti OR "Data Sciences".ti OR "Data Analytics".ti OR "Data driven".ti OR "Bayesian Network".ti OR "Bayes Network".ti OR "Bayesian Networks".ti OR "Bayes Networks".ti OR "Bayesian Network".ti OR "Bayes Network".ti OR "Bayesian Networks".ti OR "Bayes Networks".ti OR "Bayes Theorem"/) AND (exp *"Primary Health Care"/ OR exp *"Primary Care Nursing"/ OR exp *"general practitioner"/ OR exp *"Physicians, Family"/ OR exp *"General Practitioners"/ OR exp *"Family Practice"/ OR exp *"General Practice"/ OR "primary healthcare".ti,ab OR "Family Practice".ti,ab OR "General Practice".ti,ab OR "primary care".ti,ab OR "primary health care".ti,ab OR "Family Physician".ti,ab OR "Family Physicians".ti,ab OR "Family Doctor".ti,ab OR "Family Doctors".ti,ab OR "General Practitioner".ti,ab OR "General Practitioners".ti,ab OR "General Practice Physician".ti,ab OR "General Practice Physicians".ti,ab OR "Primary Medical Care".ti,ab OR "Family Healthcare".ti,ab OR "Family Health Care".ti,ab OR "Family Medicine".ti,ab OR "Nurse Practitioner".ti,ab OR "Nurse Practitioners".ti,ab OR "Family Nurse".ti,ab OR "Family Nurses".ti,ab OR "Family Nursing".ti,ab OR exp *"Community Medicine"/ OR "Community Medicine".ti,ab OR "Community Practice".ti,ab OR "community physician".ti,ab OR "community physicians".ti,ab OR "community doctor".ti,ab OR "community doctor".ti,ab OR "community practitioner".ti,ab OR "community practitioner".ti,ab OR "community nurse".ti,ab OR "community nurses".ti,ab OR "community nursing".ti,ab) AND (exp *"Program Evaluation"/ OR exp *"Evaluation Study"/ OR exp *"Evaluation Studies as Topic"/ OR exp *"Process Assessment, Health Care"/ OR exp *"Implementation Science"/ OR exp *"Health Plan Implementation"/ OR exp *"Pilot Projects"/ OR exp *"Pilot Study"/ OR exp *"Preliminary Data"/ OR "Adopt*".ti,ab OR "Adoption".ti,ab OR "Assess*".ti,ab OR "Assessment".ti,ab OR "Evaluat*".ti,ab OR "Evaluation studies".ti,ab OR "Evaluation study".ti,ab OR "Evaluation*".ti,ab OR "Implement*".ti,ab OR "Implementation".ti,ab OR "pilot phase".ti,ab OR "Pilot Studies".ti,ab OR "Pilot Study".ti,ab OR "Preliminary Data".ti,ab OR "Process Assess*".ti,ab OR "Process Assessment".ti,ab OR "Process Measure".ti,ab OR "Process Measures".ti,ab OR "Program Appropria*".ti,ab OR "Program Appropriateness".ti,ab OR "Program Assess*".ti,ab OR "Program Assessment".ti,ab OR "Program Effectiv*".ti,ab OR "Program Effectiveness".ti,ab OR "Program Evaluat*".ti,ab OR "Program |

| Database       | Query                                                                                                                                                                                                                                                                                                                                                                                                                                                                                                                                                                                                                                                                                                                                                                                                                                                                                                                                                                                                                                                                                                                                                                                                                                                                                                                                                                                                                                                                                                                                                                                                                                                                                                                                                                                                                                                                                                                                                                                                                                                                                                                                                                                                                                                                                                                                                                                                                                                                                                                                                                                                                                                                                                                                                                                                                                                                                                                                                                                                                                                                                                                                                                                                                                                                                                                                          |
|----------------|------------------------------------------------------------------------------------------------------------------------------------------------------------------------------------------------------------------------------------------------------------------------------------------------------------------------------------------------------------------------------------------------------------------------------------------------------------------------------------------------------------------------------------------------------------------------------------------------------------------------------------------------------------------------------------------------------------------------------------------------------------------------------------------------------------------------------------------------------------------------------------------------------------------------------------------------------------------------------------------------------------------------------------------------------------------------------------------------------------------------------------------------------------------------------------------------------------------------------------------------------------------------------------------------------------------------------------------------------------------------------------------------------------------------------------------------------------------------------------------------------------------------------------------------------------------------------------------------------------------------------------------------------------------------------------------------------------------------------------------------------------------------------------------------------------------------------------------------------------------------------------------------------------------------------------------------------------------------------------------------------------------------------------------------------------------------------------------------------------------------------------------------------------------------------------------------------------------------------------------------------------------------------------------------------------------------------------------------------------------------------------------------------------------------------------------------------------------------------------------------------------------------------------------------------------------------------------------------------------------------------------------------------------------------------------------------------------------------------------------------------------------------------------------------------------------------------------------------------------------------------------------------------------------------------------------------------------------------------------------------------------------------------------------------------------------------------------------------------------------------------------------------------------------------------------------------------------------------------------------------------------------------------------------------------------------------------------------------|
|                | Evaluation".ti,ab OR "Program Sustain*".ti,ab OR "Program Sustainability".ti,ab OR "Programme Appropriat*".ti,ab OR "Programme Appropriateness".ti,ab OR "Programme Assess*".ti,ab OR "Programme Assessment".ti,ab OR "Programme Effectiv*".ti,ab OR "Programme Effectiveness".ti,ab OR "Programme Evaluat*".ti,ab OR "Programme Evaluation".ti,ab OR "Programme Sustain*".ti,ab OR "Programme Sustainability".ti,ab))                                                                                                                                                                                                                                                                                                                                                                                                                                                                                                                                                                                                                                                                                                                                                                                                                                                                                                                                                                                                                                                                                                                                                                                                                                                                                                                                                                                                                                                                                                                                                                                                                                                                                                                                                                                                                                                                                                                                                                                                                                                                                                                                                                                                                                                                                                                                                                                                                                                                                                                                                                                                                                                                                                                                                                                                                                                                                                                         |
| Web of Science | ((ti=("Artificial Intelligence" OR "machine learning" OR "Artificial Intelligence" OR "Biological Ontologies" OR "Biological Ontology" OR "Computational Intelligence" OR "Computer Heuristics" OR "Computer Intelligence" OR "Computer Neural Network" OR "Computer Neural Networks" OR "Computer Reasoning" OR "Computer Vision System" OR "Computer Vision Systems" OR "Deep Learning" OR "Machine Intelligence" OR "Machine Learning" OR "Natural Language Processing" OR "Robotic" OR "Robotics" OR "Supervised Machine Learning" OR "Support Vector Machine" OR "Support Vector Machines" OR "Unsupervised Machine Learning" OR "Knowledge Acquisition" OR "Knowledge Representation" OR "Neural Network" OR "Neural Networks" OR "Neural Network*" OR "Data Mining" OR "Data Mining" OR "text mining" OR "Multifactor Dimensionality Reduction" OR "Big Data" OR "Big Data" OR "Data Science" OR "Data Science" OR "Data Sciences" OR "Data Analytics" OR "Data driven" OR "Datasets as Topic" OR "Bayesian Network" OR "Bayes Network" OR "Bayesian Networks" OR "Bayes Networks" OR "Bayesian Network" OR "Bayes Network" OR "Bayesian Networks" OR "Bayes Networks" OR "Bayes Theorem") AND ts=("Primary Health Care" OR "Primary Care Nursing" OR "general practitioner" OR "Physicians, Family" OR "General Practitioners" OR "Family Practice" OR "General Practice" OR "primary healthcare" OR "Family Practice" OR "General Practice" OR "primary care" OR "primary health care" OR "Family Physician" OR "Family Physicians" OR "Family Doctor" OR "Family Doctors" OR "General Practitioner" OR "General Practitioners" OR "General Practice Physician" OR "General Practice Physicians" OR "Primary Medical Care" OR "Family Healthcare" OR "Family Health Care" OR "Family Medicine" OR "Nurse Practitioner" OR "Nurse Practitioners" OR "Family Nurse" OR "Family Nurses" OR "Family Nursing" OR "Community Medicine" OR "Community Medicine" OR "Community Practice" OR "community physician" OR "community physicians" OR "community doctor" OR "community doctor" OR "community practitioner" OR "community practitioner" OR "community nurse" OR "community nurses" OR "community nursing") AND ts=("Program Evaluation" OR "Evaluation Study" OR "Evaluation Studies as Topic" OR "Process Assessment, Health Care" OR "Implementation Science" OR "Health Plan Implementation" OR "Pilot Projects" OR "Pilot Study" OR "Preliminary Data" OR "Adopt*" OR "Adoption" OR "Assess*" OR "Assessment" OR "Evaluat*" OR "Evaluation studies" OR "Evaluation study" OR "Evaluation*" OR "Implement*" OR "Implementation" OR "pilot phase" OR "Pilot Studies" OR "Pilot Study" OR "Preliminary Data" OR "Process Assess*" OR "Process Assessment" OR "Process Measure" OR "Process Measures" OR "Program Appropriat*" OR "Program Appropriateness" OR "Program Assess*" OR "Program Assessment" OR "Program Effectiv*" OR "Program Effectiveness" OR "Program Evaluat*" OR "Program Evaluation" OR "Program Sustain*" OR "Program Sustainability" OR "Programme Appropriat*" OR "Programme Appropriateness" OR "Programme Assess*" OR "Programme Assessment" OR "Programme Effectiv*" OR "Programme Effectiveness" OR "Programme Evaluat*" OR "Programme Evaluation" OR "Programme Sustain*" OR "Programme Sustainability")) |
| Cochrane       | (((("Artificial Intelligence" OR "machine learning" OR "Artificial Intelligence" OR "Biological Ontologies" OR "Biological Ontology" OR "Computational Intelligence" OR "Computer Heuristics" OR "Computer Intelligence" OR "Computer Neural Network" OR "Computer Neural Networks" OR "Computer Reasoning" OR "Computer Vision System" OR "Computer Vision Systems" OR                                                                                                                                                                                                                                                                                                                                                                                                                                                                                                                                                                                                                                                                                                                                                                                                                                                                                                                                                                                                                                                                                                                                                                                                                                                                                                                                                                                                                                                                                                                                                                                                                                                                                                                                                                                                                                                                                                                                                                                                                                                                                                                                                                                                                                                                                                                                                                                                                                                                                                                                                                                                                                                                                                                                                                                                                                                                                                                                                                        |

| Database | Query                                                                                                                                                                                                                                                                                                                                                                                                                                                                                                                                                                                                                                                                                                                                                                                                                                                                                                                                                                                                                                                                                                                                                                                                                                                                                                                                                                                                                                                                                                                                                                                                                                                                                                                                                                                                                                                                                                                                                                                                                                                                                                                                                                                                                                                                                                                                                                                                                                                                                                                                                                                                                                                                                                                                                                                                                                                                                                                                                                                                                                                                                                                  |
|----------|------------------------------------------------------------------------------------------------------------------------------------------------------------------------------------------------------------------------------------------------------------------------------------------------------------------------------------------------------------------------------------------------------------------------------------------------------------------------------------------------------------------------------------------------------------------------------------------------------------------------------------------------------------------------------------------------------------------------------------------------------------------------------------------------------------------------------------------------------------------------------------------------------------------------------------------------------------------------------------------------------------------------------------------------------------------------------------------------------------------------------------------------------------------------------------------------------------------------------------------------------------------------------------------------------------------------------------------------------------------------------------------------------------------------------------------------------------------------------------------------------------------------------------------------------------------------------------------------------------------------------------------------------------------------------------------------------------------------------------------------------------------------------------------------------------------------------------------------------------------------------------------------------------------------------------------------------------------------------------------------------------------------------------------------------------------------------------------------------------------------------------------------------------------------------------------------------------------------------------------------------------------------------------------------------------------------------------------------------------------------------------------------------------------------------------------------------------------------------------------------------------------------------------------------------------------------------------------------------------------------------------------------------------------------------------------------------------------------------------------------------------------------------------------------------------------------------------------------------------------------------------------------------------------------------------------------------------------------------------------------------------------------------------------------------------------------------------------------------------------------|
|          | <p>"Deep Learning" OR "Expert System" OR "Expert Systems" OR "Fuzzy Logic" OR "Hierarchical Learning" OR "Knowledge Base" OR "Knowledge Bases" OR "Machine Intelligence" OR "Machine Learning" OR "Natural Language Processing" OR "Robotic" OR "Robotics" OR "Supervised Machine Learning" OR "Support Vector Machine" OR "Support Vector Machines" OR "Unsupervised Machine Learning" OR "Knowledge Acquisition" OR "Knowledge Representation" OR "Neural Network" OR "Neural Networks" OR "Neural Network*" OR "Data Mining" OR "Data Mining" OR "text mining" OR "Multifactor Dimensionality Reduction" OR "Big Data" OR "Big Data" OR "Data Science" OR "Data Science" OR "Data Sciences" OR "Data Analytics" OR "Data driven" OR "Datasets as Topic" OR "Bayesian Network" OR "Bayes Network" OR "Bayesian Networks" OR "Bayes Networks" OR "Bayesian Network" OR "Bayes Network" OR "Bayesian Networks" OR "Bayes Networks" OR "Bayes Theorem"):ti AND ("Primary Health Care" OR "Primary Care Nursing" OR "general practitioner" OR "Physicians, Family" OR "General Practitioners" OR "Family Practice" OR "General Practice" OR "primary healthcare" OR "Family Practice" OR "General Practice" OR "primary care" OR "primary health care" OR "Family Physician" OR "Family Physicians" OR "Family Doctor" OR "Family Doctors" OR "General Practitioner" OR "General Practitioners" OR "General Practice Physician" OR "General Practice Physicians" OR "Primary Medical Care" OR "Family Healthcare" OR "Family Health Care" OR "Family Medicine" OR "Nurse Practitioner" OR "Nurse Practitioners" OR "Family Nurse" OR "Family Nurses" OR "Family Nursing" OR "Community Medicine" OR "Community Medicine" OR "Community Practice" OR "community physician" OR "community physicians" OR "community doctor" OR "community doctor" OR "community practitioner" OR "community practitioner" OR "community nurse" OR "community nurses" OR "community nursing"):ti,ab,kw AND ("Program Evaluation" OR "Evaluation Study" OR "Evaluation Studies as Topic" OR "Process Assessment, Health Care" OR "Implementation Science" OR "Health Plan Implementation" OR "Pilot Projects" OR "Pilot Study" OR "Preliminary Data" OR "Adopt*" OR "Adoption" OR "Assess*" OR "Assessment" OR "Evaluat*" OR "Evaluation studies" OR "Evaluation study" OR "Evaluation*" OR "Implement*" OR "Implementation" OR "pilot phase" OR "Pilot Studies" OR "Pilot Study" OR "Preliminary Data" OR "Process Assess*" OR "Process Assessment" OR "Process Measure" OR "Process Measures" OR "Program Appropriat*" OR "Program Appropriateness" OR "Program Assess*" OR "Program Assessment" OR "Program Effectiv*" OR "Program Effectiveness" OR "Program Evaluat*" OR "Program Evaluation" OR "Program Sustain*" OR "Program Sustainability" OR "Programme Appropriat*" OR "Programme Appropriateness" OR "Programme Assess*" OR "Programme Assessment" OR "Programme Effectiv*" OR "Programme Effectiveness" OR "Programme Evaluat*" OR "Programme Evaluation" OR "Programme Sustain*" OR "Programme Sustainability"):ti,ab,kw)</p> |
| Emcare   | <p>((exp *"Artificial Intelligence"/ OR exp *"machine learning"/ OR "Artificial Intelligence".ti OR "Biological Ontologies".ti OR "Biological Ontology".ti OR "Computational Intelligence".ti OR "Computer Heuristics".ti OR "Computer Intelligence".ti OR "Computer Neural Network".ti OR "Computer Neural Networks".ti OR "Computer Reasoning".ti OR "Computer Vision System".ti OR "Computer Vision Systems".ti OR "Deep Learning".ti OR "Expert System".ti OR "Expert Systems".ti OR "Fuzzy Logic".ti OR "Hierarchical Learning".ti OR "Knowledge Base".ti OR "Knowledge Bases".ti OR "Machine Intelligence".ti OR "Machine Learning".ti OR "Natural Language Processing".ti OR "Robotic".ti OR "Robotics".ti OR "Supervised Machine Learning".ti OR "Support Vector Machine".ti OR "Support Vector Machines".ti OR "Unsupervised Machine Learning".ti OR "Knowledge Acquisition".ti OR "Knowledge Representation".ti OR "Neural Network".ti OR "Neural Networks".ti OR "Neural Network*".ti OR "Data Mining"/ OR "Data Mining".ti OR "text mining".ti OR "Multifactor Dimensionality Reduction".ti OR "Big</p>                                                                                                                                                                                                                                                                                                                                                                                                                                                                                                                                                                                                                                                                                                                                                                                                                                                                                                                                                                                                                                                                                                                                                                                                                                                                                                                                                                                                                                                                                                                                                                                                                                                                                                                                                                                                                                                                                                                                                                                                    |

| Database | Query                                                                                                                                                                                                                                                                                                                                                                                                                                                                                                                                                                                                                                                                                                                                                                                                                                                                                                                                                                                                                                                                                                                                                                                                                                                                                                                                                                                                                                                                                                                                                                                                                                                                                                                                                                                                                                                                                                                                                                                                                                                                                                                                                                                                                                                                                                                                                                                                                                                                                                                                                                                                                                                                                                                                                                                                                                                                                                                                                                                                                                                                                                                                                                                                                                                                                                                                                                                                                                                                                                                                                                                                                                                                                                                                                                                                                                                                                                                                                                                                                                                                                                                                                                                                                                                                                                                                                     |
|----------|-----------------------------------------------------------------------------------------------------------------------------------------------------------------------------------------------------------------------------------------------------------------------------------------------------------------------------------------------------------------------------------------------------------------------------------------------------------------------------------------------------------------------------------------------------------------------------------------------------------------------------------------------------------------------------------------------------------------------------------------------------------------------------------------------------------------------------------------------------------------------------------------------------------------------------------------------------------------------------------------------------------------------------------------------------------------------------------------------------------------------------------------------------------------------------------------------------------------------------------------------------------------------------------------------------------------------------------------------------------------------------------------------------------------------------------------------------------------------------------------------------------------------------------------------------------------------------------------------------------------------------------------------------------------------------------------------------------------------------------------------------------------------------------------------------------------------------------------------------------------------------------------------------------------------------------------------------------------------------------------------------------------------------------------------------------------------------------------------------------------------------------------------------------------------------------------------------------------------------------------------------------------------------------------------------------------------------------------------------------------------------------------------------------------------------------------------------------------------------------------------------------------------------------------------------------------------------------------------------------------------------------------------------------------------------------------------------------------------------------------------------------------------------------------------------------------------------------------------------------------------------------------------------------------------------------------------------------------------------------------------------------------------------------------------------------------------------------------------------------------------------------------------------------------------------------------------------------------------------------------------------------------------------------------------------------------------------------------------------------------------------------------------------------------------------------------------------------------------------------------------------------------------------------------------------------------------------------------------------------------------------------------------------------------------------------------------------------------------------------------------------------------------------------------------------------------------------------------------------------------------------------------------------------------------------------------------------------------------------------------------------------------------------------------------------------------------------------------------------------------------------------------------------------------------------------------------------------------------------------------------------------------------------------------------------------------------------------------------------------|
|          | <p>Data"/ OR "Big Data".ti OR "Data Science"/ OR "Data Science".ti OR "Data Sciences".ti OR "Data Analytics".ti OR "Data driven".ti OR "Bayesian Network".ti OR "Bayes Network".ti OR "Bayesian Networks".ti OR "Bayes Networks".ti OR "Bayesian Network".ti OR "Bayes Network".ti OR "Bayesian Networks".ti OR "Bayes Networks".ti OR "Bayes Theorem"/) AND (exp *"Primary Health Care"/ OR exp *"Primary Care Nursing"/ OR exp *"general practitioner"/ OR exp *"Physicians, Family"/ OR exp *"General Practitioners"/ OR exp *"Family Practice"/ OR exp *"General Practice"/ OR "primary healthcare".ti,ab OR "Family Practice".ti,ab OR "General Practice".ti,ab OR "primary care".ti,ab OR "primary health care".ti,ab OR "Family Physician".ti,ab OR "Family Physicians".ti,ab OR "Family Doctor".ti,ab OR "Family Doctors".ti,ab OR "General Practitioner".ti,ab OR "General Practitioners".ti,ab OR "General Practice Physician".ti,ab OR "General Practice Physicians".ti,ab OR "Primary Medical Care".ti,ab OR "Family Healthcare".ti,ab OR "Family Health Care".ti,ab OR "Family Medicine".ti,ab OR "Nurse Practitioner".ti,ab OR "Nurse Practitioners".ti,ab OR "Family Nurse".ti,ab OR "Family Nurses".ti,ab OR "Family Nursing".ti,ab OR exp *"Community Medicine"/ OR "Community Medicine".ti,ab OR "Community Practice".ti,ab OR "community physician".ti,ab OR "community physicians".ti,ab OR "community doctor".ti,ab OR "community doctor".ti,ab OR "community practitioner".ti,ab OR "community practitioner".ti,ab OR "community nurse".ti,ab OR "community nurses".ti,ab OR "community nursing".ti,ab) AND (exp *"Program Evaluation"/ OR exp *"Evaluation Study"/ OR exp *"Evaluation Studies as Topic"/ OR exp *"Process Assessment, Health Care"/ OR exp *"Implementation Science"/ OR exp *"Health Plan Implementation"/ OR exp *"Pilot Projects"/ OR exp *"Pilot Study"/ OR exp *"Preliminary Data"/ OR "Adopt*".ti,ab OR "Adoption".ti,ab OR "Assess*".ti,ab OR "Assessment".ti,ab OR "Evaluat*".ti,ab OR "Evaluation studies".ti,ab OR "Evaluation study".ti,ab OR "Evaluation*".ti,ab OR "Implement*".ti,ab OR "Implementation".ti,ab OR "pilot phase".ti,ab OR "Pilot Studies".ti,ab OR "Pilot Study".ti,ab OR "Preliminary Data".ti,ab OR "Process Assess*".ti,ab OR "Process Assessment".ti,ab OR "Process Measure".ti,ab OR "Process Measures".ti,ab OR "Program Appropria*".ti,ab OR "Program Appropriateness".ti,ab OR "Program Assess*".ti,ab OR "Program Assessment".ti,ab OR "Program Effectiv*".ti,ab OR "Program Effectiveness".ti,ab OR "Program Evaluat*".ti,ab OR "Program Evaluation".ti,ab OR "Program Sustain*".ti,ab OR "Program Sustainability".ti,ab OR "Programme Appropria*".ti,ab OR "Programme Appropriateness".ti,ab OR "Programme Assess*".ti,ab OR "Programme Assessment".ti,ab OR "Programme Effectiv*".ti,ab OR "Programme Effectiveness".ti,ab OR "Programme Evaluat*".ti,ab OR "Programme Evaluation".ti,ab OR "Programme Sustain*".ti,ab OR "Programme Sustainability".ti,ab)) OR ((exp *"Artificial Intelligence"/ OR exp *"machine learning"/ OR "Artificial Intelligence".ti,ab OR "Biological Ontologies".ti,ab OR "Biological Ontology".ti,ab OR "Computational Intelligence".ti,ab OR "Computer Heuristics".ti,ab OR "Computer Intelligence".ti,ab OR "Computer Neural Network".ti,ab OR "Computer Neural Networks".ti,ab OR "Computer Reasoning".ti,ab OR "Computer Vision System".ti,ab OR "Computer Vision Systems".ti,ab OR "Deep Learning".ti,ab OR "Expert System".ti,ab OR "Expert Systems".ti,ab OR "Fuzzy Logic".ti,ab OR "Hierarchical Learning".ti,ab OR "Knowledge Base".ti,ab OR "Knowledge Bases".ti,ab OR "Machine Intelligence".ti,ab OR "Machine Learning".ti,ab OR "Natural Language Processing".ti,ab OR "Robotic".ti,ab OR "Robotics".ti,ab OR "Supervised Machine Learning".ti,ab OR "Support Vector Machine".ti,ab OR "Support Vector Machines".ti,ab OR "Unsupervised Machine Learning".ti,ab OR "Knowledge Acquisition".ti,ab OR "Knowledge Representation".ti,ab OR "Neural Network".ti,ab OR "Neural Networks".ti,ab OR "Neural Network*".ti,ab OR "Data Mining"/ OR "Data Mining".ti,ab OR "text mining".ti,ab OR "Multifactor Dimensionality Reduction".ti,ab OR "Big Data"/ OR "Big Data".ti,ab OR "Data Science"/ OR "Data Science".ti,ab OR "Data</p> |

| Database | Query                                                                                                                                                                                                                                                                                                                                                                                                                                                                                                                                                                                                                                                                                                                                                                                                                                                                                                                                                                                                                                                                                                                                                                                                                                                                                                                                                                                                                                                                                                                                                                                                                                                                                                                                                                                                                                                                                                                                                                                                                                                                                                                                                                                                                                                                                                                                                                                                                                                                                                                                                                                                                                                                                                                                                                                                                                                                                                                                                                                                                                                                                                                                                                                                                                                                                                                                                                                                                                                                                                                                                                                                                                                                                                                                                                                                                                                                                                                                                                                                                                                                                                                                                                                                                                                                                                                                                      |
|----------|------------------------------------------------------------------------------------------------------------------------------------------------------------------------------------------------------------------------------------------------------------------------------------------------------------------------------------------------------------------------------------------------------------------------------------------------------------------------------------------------------------------------------------------------------------------------------------------------------------------------------------------------------------------------------------------------------------------------------------------------------------------------------------------------------------------------------------------------------------------------------------------------------------------------------------------------------------------------------------------------------------------------------------------------------------------------------------------------------------------------------------------------------------------------------------------------------------------------------------------------------------------------------------------------------------------------------------------------------------------------------------------------------------------------------------------------------------------------------------------------------------------------------------------------------------------------------------------------------------------------------------------------------------------------------------------------------------------------------------------------------------------------------------------------------------------------------------------------------------------------------------------------------------------------------------------------------------------------------------------------------------------------------------------------------------------------------------------------------------------------------------------------------------------------------------------------------------------------------------------------------------------------------------------------------------------------------------------------------------------------------------------------------------------------------------------------------------------------------------------------------------------------------------------------------------------------------------------------------------------------------------------------------------------------------------------------------------------------------------------------------------------------------------------------------------------------------------------------------------------------------------------------------------------------------------------------------------------------------------------------------------------------------------------------------------------------------------------------------------------------------------------------------------------------------------------------------------------------------------------------------------------------------------------------------------------------------------------------------------------------------------------------------------------------------------------------------------------------------------------------------------------------------------------------------------------------------------------------------------------------------------------------------------------------------------------------------------------------------------------------------------------------------------------------------------------------------------------------------------------------------------------------------------------------------------------------------------------------------------------------------------------------------------------------------------------------------------------------------------------------------------------------------------------------------------------------------------------------------------------------------------------------------------------------------------------------------------------------------------|
|          | <p>Sciences".ti,ab OR "Data Analytics".ti,ab OR "Data driven".ti,ab OR "Bayesian Network".ti,ab OR "Bayes Network".ti,ab OR "Bayesian Networks".ti,ab OR "Bayes Networks".ti,ab OR "Bayesian Network".ti,ab OR "Bayes Network".ti,ab OR "Bayesian Networks".ti,ab OR "Bayes Networks".ti,ab OR "Bayes Theorem"/) AND (exp *"Primary Health Care"/ OR exp *"Primary Care Nursing"/ OR exp *"general practitioner"/ OR exp *"Physicians, Family"/ OR exp *"General Practitioners"/ OR exp *"Family Practice"/ OR exp *"General Practice"/ OR "primary healthcare".ti OR "Family Practice".ti OR "General Practice".ti OR "primary care".ti OR "primary health care".ti OR "Family Physician".ti OR "Family Physicians".ti OR "Family Doctor".ti OR "Family Doctors".ti OR "General Practitioner".ti OR "General Practitioners".ti OR "General Practice Physician".ti OR "General Practice Physicians".ti OR "Primary Medical Care".ti OR "Family Healthcare".ti OR "Family Health Care".ti OR "Family Medicine".ti OR "Nurse Practitioner".ti OR "Nurse Practitioners".ti OR "Family Nurse".ti OR "Family Nurses".ti OR "Family Nursing".ti OR exp *"Community Medicine"/ OR "Community Medicine".ti OR "Community Practice".ti OR "community physician".ti OR "community physicians".ti OR "community doctor".ti OR "community doctor".ti OR "community practitioner".ti OR "community practitioner".ti OR "community nurse".ti OR "community nurses".ti OR "community nursing".ti) AND (exp *"Program Evaluation"/ OR exp *"Evaluation Study"/ OR exp *"Evaluation Studies as Topic"/ OR exp *"Process Assessment, Health Care"/ OR exp *"Implementation Science"/ OR exp *"Health Plan Implementation"/ OR exp *"Pilot Projects"/ OR exp *"Pilot Study"/ OR exp *"Preliminary Data"/ OR "Adopt*".ti,ab OR "Adoption".ti,ab OR "Assess*".ti,ab OR "Assessment".ti,ab OR "Evaluat*".ti,ab OR "Evaluation studies".ti,ab OR "Evaluation study".ti,ab OR "Evaluation*".ti,ab OR "Implement*".ti,ab OR "Implementation".ti,ab OR "pilot phase".ti,ab OR "Pilot Studies".ti,ab OR "Pilot Study".ti,ab OR "Preliminary Data".ti,ab OR "Process Assess*".ti,ab OR "Process Assessment".ti,ab OR "Process Measure".ti,ab OR "Process Measures".ti,ab OR "Program Appropria*".ti,ab OR "Program Appropriateness".ti,ab OR "Program Assess*".ti,ab OR "Program Assessment".ti,ab OR "Program Effectiv*".ti,ab OR "Program Effectiveness".ti,ab OR "Program Evaluat*".ti,ab OR "Program Evaluation".ti,ab OR "Program Sustain*".ti,ab OR "Program Sustainability".ti,ab OR "Programme Appropria*".ti,ab OR "Programme Appropriateness".ti,ab OR "Programme Assess*".ti,ab OR "Programme Assessment".ti,ab OR "Programme Effectiv*".ti,ab OR "Programme Effectiveness".ti,ab OR "Programme Evaluat*".ti,ab OR "Programme Evaluation".ti,ab OR "Programme Sustain*".ti,ab OR "Programme Sustainability".ti,ab)) OR ((exp *"Artificial Intelligence"/ OR exp *"machine learning"/ OR "Artificial Intelligence".ti OR "Biological Ontologies".ti OR "Biological Ontology".ti OR "Computational Intelligence".ti OR "Computer Heuristics".ti OR "Computer Intelligence".ti OR "Computer Neural Network".ti OR "Computer Neural Networks".ti OR "Computer Reasoning".ti OR "Computer Vision System".ti OR "Computer Vision Systems".ti OR "Deep Learning".ti OR "Expert System".ti OR "Expert Systems".ti OR "Fuzzy Logic".ti OR "Hierarchical Learning".ti OR "Knowledge Base".ti OR "Knowledge Bases".ti OR "Machine Intelligence".ti OR "Machine Learning".ti OR "Natural Language Processing".ti OR "Robotic".ti OR "Robotics".ti OR "Supervised Machine Learning".ti OR "Support Vector Machine".ti OR "Support Vector Machines".ti OR "Unsupervised Machine Learning".ti OR "Knowledge Acquisition".ti OR "Knowledge Representation".ti OR "Neural Network".ti OR "Neural Networks".ti OR "Neural Network*".ti OR "Data Mining"/ OR "Data Mining".ti OR "text mining".ti OR "Multifactor Dimensionality Reduction".ti OR "Big Data"/ OR "Big Data".ti OR "Data Science"/ OR "Data Science".ti OR "Data Sciences".ti OR "Data Analytics".ti OR "Data driven".ti OR "Bayesian Network".ti OR "Bayes Network".ti OR "Bayesian Networks".ti OR "Bayes Networks".ti OR "Bayesian Network".ti OR "Bayes Network".ti OR "Bayesian Networks".ti OR "Bayes Networks".ti OR</p> |

| Database                | Query                                                                                                                                                                                                                                                                                                                                                                                                                                                                                                                                                                                                                                                                                                                                                                                                                                                                                                                                                                                                                                                                                                                                                                                                                                                                                                                                                                                                                                                                                                                                                                                                                                                                                                                                                                                                                                                                                                                                                                                                                                                                                                                                                                                                                                                                                                                                                                                                                                                                                                                                                                                                                                                                                                                                                                                                                                                                                                                                                                                                                                                                                                                      |
|-------------------------|----------------------------------------------------------------------------------------------------------------------------------------------------------------------------------------------------------------------------------------------------------------------------------------------------------------------------------------------------------------------------------------------------------------------------------------------------------------------------------------------------------------------------------------------------------------------------------------------------------------------------------------------------------------------------------------------------------------------------------------------------------------------------------------------------------------------------------------------------------------------------------------------------------------------------------------------------------------------------------------------------------------------------------------------------------------------------------------------------------------------------------------------------------------------------------------------------------------------------------------------------------------------------------------------------------------------------------------------------------------------------------------------------------------------------------------------------------------------------------------------------------------------------------------------------------------------------------------------------------------------------------------------------------------------------------------------------------------------------------------------------------------------------------------------------------------------------------------------------------------------------------------------------------------------------------------------------------------------------------------------------------------------------------------------------------------------------------------------------------------------------------------------------------------------------------------------------------------------------------------------------------------------------------------------------------------------------------------------------------------------------------------------------------------------------------------------------------------------------------------------------------------------------------------------------------------------------------------------------------------------------------------------------------------------------------------------------------------------------------------------------------------------------------------------------------------------------------------------------------------------------------------------------------------------------------------------------------------------------------------------------------------------------------------------------------------------------------------------------------------------------|
|                         | <p>"Bayes Theorem"/) AND (exp *"Primary Health Care"/ OR exp *"Primary Care Nursing"/ OR exp *"general practitioner"/ OR exp *"Physicians, Family"/ OR exp *"General Practitioners"/ OR exp *"Family Practice"/ OR exp *"General Practice"/ OR "primary healthcare".ti OR "Family Practice".ti OR "General Practice".ti OR "primary care".ti OR "primary health care".ti OR "Family Physician".ti OR "Family Physicians".ti OR "Family Doctor".ti OR "Family Doctors".ti OR "General Practitioner".ti OR "General Practitioners".ti OR "General Practice Physician".ti OR "General Practice Physicians".ti OR "Primary Medical Care".ti OR "Family Healthcare".ti OR "Family Health Care".ti OR "Family Medicine".ti OR "Nurse Practitioner".ti OR "Nurse Practitioners".ti OR "Family Nurse".ti OR "Family Nurses".ti OR "Family Nursing".ti OR exp *"Community Medicine"/ OR "Community Medicine".ti OR "Community Practice".ti OR "community physician".ti OR "community physicians".ti OR "community doctor".ti OR "community doctor".ti OR "community practitioner".ti OR "community practitioner".ti OR "community nurse".ti OR "community nurses".ti OR "community nursing".ti))</p>                                                                                                                                                                                                                                                                                                                                                                                                                                                                                                                                                                                                                                                                                                                                                                                                                                                                                                                                                                                                                                                                                                                                                                                                                                                                                                                                                                                                                                                                                                                                                                                                                                                                                                                                                                                                                                                                                                                                |
| Academic Search Premier | <p>((TI("Artificial Intelligence" OR "machine learning" OR "Artificial Intelligence" OR "Biological Ontologies" OR "Biological Ontology" OR "Computational Intelligence" OR "Computer Heuristics" OR "Computer Intelligence" OR "Computer Neural Network" OR "Computer Neural Networks" OR "Computer Reasoning" OR "Computer Vision System" OR "Computer Vision Systems" OR "Deep Learning" OR "Expert System" OR "Expert Systems" OR "Fuzzy Logic" OR "Hierarchical Learning" OR "Knowledge Base" OR "Knowledge Bases" OR "Machine Intelligence" OR "Machine Learning" OR "Natural Language Processing" OR "Robotic" OR "Robotics" OR "Supervised Machine Learning" OR "Support Vector Machine" OR "Support Vector Machines" OR "Unsupervised Machine Learning" OR "Knowledge Acquisition" OR "Knowledge Representation" OR "Neural Network" OR "Neural Networks" OR "Neural Network*" OR "Data Mining" OR "Data Mining" OR "text mining" OR "Multifactor Dimensionality Reduction" OR "Big Data" OR "Big Data" OR "Data Science" OR "Data Science" OR "Data Sciences" OR "Data Analytics" OR "Data driven" OR "Datasets as Topic" OR "Bayesian Network" OR "Bayes Network" OR "Bayesian Networks" OR "Bayes Networks" OR "Bayesian Network" OR "Bayes Network" OR "Bayesian Networks" OR "Bayes Networks" OR "Bayes Theorem") AND KW("Primary Health Care" OR "Primary Care Nursing" OR "general practitioner" OR "Physicians, Family" OR "General Practitioners" OR "Family Practice" OR "General Practice" OR "primary healthcare" OR "Family Practice" OR "General Practice" OR "primary care" OR "primary health care" OR "Family Physician" OR "Family Physicians" OR "Family Doctor" OR "Family Doctors" OR "General Practitioner" OR "General Practitioners" OR "General Practice Physician" OR "General Practice Physicians" OR "Primary Medical Care" OR "Family Healthcare" OR "Family Health Care" OR "Family Medicine" OR "Nurse Practitioner" OR "Nurse Practitioners" OR "Family Nurse" OR "Family Nurses" OR "Family Nursing" OR "Community Medicine" OR "Community Medicine" OR "Community Practice" OR "community physician" OR "community physicians" OR "community doctor" OR "community doctor" OR "community practitioner" OR "community practitioner" OR "community nurse" OR "community nurses" OR "community nursing") AND KW("Program Evaluation" OR "Evaluation Study" OR "Evaluation Studies as Topic" OR "Process Assessment, Health Care" OR "Implementation Science" OR "Health Plan Implementation" OR "Pilot Projects" OR "Pilot Study" OR "Preliminary Data" OR "Adopt*" OR "Adoption" OR "Assess*" OR "Assessment" OR "Evaluat*" OR "Evaluation studies" OR "Evaluation study" OR "Evaluation*" OR "Implement*" OR "Implementation" OR "pilot phase" OR "Pilot Studies" OR "Pilot Study" OR "Preliminary Data" OR "Process Assess*" OR "Process Assessment" OR "Process Measure" OR "Process Measures" OR "Program Appropriat*" OR "Program Appropriateness" OR "Program Assess*" OR "Program Assessment" OR "Program Effectiv*" OR "Program Effectiveness" OR "Program Evaluat*")</p> |



| Database            | Query                                                                                                                                                                                                                                                                                                                                                                                                                                                                                                                                                                                                                                                                                                                                                                                                                                                                                                                                                                                                                                                                                                                                                                                                                                                                                            |
|---------------------|--------------------------------------------------------------------------------------------------------------------------------------------------------------------------------------------------------------------------------------------------------------------------------------------------------------------------------------------------------------------------------------------------------------------------------------------------------------------------------------------------------------------------------------------------------------------------------------------------------------------------------------------------------------------------------------------------------------------------------------------------------------------------------------------------------------------------------------------------------------------------------------------------------------------------------------------------------------------------------------------------------------------------------------------------------------------------------------------------------------------------------------------------------------------------------------------------------------------------------------------------------------------------------------------------|
|                     | OR "Program Evaluation" OR "Program Sustain*" OR "Program Sustainability" OR "Programme Appropriat*" OR "Programme Appropriateness" OR "Programme Assess*" OR "Programme Assessment" OR "Programme Effectiv*" OR "Programme Effectiveness" OR "Programme Evaluat*" OR "Programme Evaluation" OR "Programme Sustain*" OR "Programme Sustainability"))                                                                                                                                                                                                                                                                                                                                                                                                                                                                                                                                                                                                                                                                                                                                                                                                                                                                                                                                             |
| IEEE Xplore         | ("Artificial Intelligence" OR "machine learning" OR "Deep Learning" OR "Expert System" OR "Data Mining" OR "text mining" OR "Big Data" OR "Data Science" OR "Data Analytics" OR "Data driven" OR "Bayesian" OR "Bayes") AND ("Primary Health Care" OR "Primary Care" OR "general practitioner" OR "Family Practice" OR "General Practice" OR "primary healthcare" OR "Community Medicine" OR "Community Practice" OR "community physician" OR "community nursing")                                                                                                                                                                                                                                                                                                                                                                                                                                                                                                                                                                                                                                                                                                                                                                                                                               |
| ACM Digital Library | ("Artificial Intelligence" OR "machine learning" OR "Artificial Intelligence" OR "Biological Ontologies" OR "Biological Ontology" OR "Computational Intelligence" OR "Computer Heuristics" OR "Computer Intelligence" OR "Computer Neural Network" OR "Computer Neural Networks" OR "Computer Reasoning" OR "Computer Vision System" OR "Computer Vision Systems" OR "Deep Learning" OR "Expert System" OR "Expert Systems" OR "Fuzzy Logic" OR "Hierarchical Learning" OR "Knowledge Base" OR "Knowledge Bases" OR "Machine Intelligence" OR "Machine Learning" OR "Natural Language Processing" OR "Robotic" OR "Robotics" OR "Supervised Machine Learning" OR "Support Vector Machine" OR "Support Vector Machines" OR "Unsupervised Machine Learning" OR "Knowledge Acquisition" OR "Knowledge Representation" OR "Neural Network" OR "Neural Networks" OR "Neural Network" OR "Data Mining" OR "Data Mining" OR "text mining" OR "Multifactor Dimensionality Reduction" OR "Big Data" OR "Big Data" OR "Data Science" OR "Data Science" OR "Data Sciences" OR "Data Analytics" OR "Data driven" OR "Bayesian Network" OR "Bayes Network" OR "Bayesian Networks" OR "Bayes Networks" OR "Bayesian Network" OR "Bayes Network" OR "Bayesian Networks" OR "Bayes Networks" OR "Bayes Theorem") |
| MathSciNet          | ("Artificial Intelligence" OR "machine learning" OR "Artificial Intelligence" OR "Biological Ontologies" OR "Biological Ontology" OR "Computational Intelligence" OR "Computer Heuristics" OR "Computer Intelligence" OR "Computer Neural Network" OR "Computer Neural Networks" OR "Computer Reasoning" OR "Computer Vision System" OR "Computer Vision Systems" OR "Deep Learning" OR "Expert System" OR "Expert Systems" OR "Fuzzy Logic" OR "Hierarchical Learning" OR "Knowledge Base" OR "Knowledge Bases" OR "Machine Intelligence" OR "Machine Learning" OR "Natural Language Processing" OR "Robotic" OR "Robotics" OR "Supervised Machine Learning" OR "Support Vector Machine" OR "Support Vector Machines" OR "Unsupervised Machine Learning" OR "Knowledge Acquisition" OR "Knowledge Representation" OR "Neural Network" OR "Neural Networks" OR "Neural Network" OR "Data Mining" OR "Data Mining" OR "text mining" OR "Multifactor Dimensionality Reduction" OR "Big Data" OR "Big Data" OR "Data Science" OR "Data Science" OR "Data Sciences" OR "Data Analytics" OR "Data driven" OR "Bayesian Network" OR "Bayes Network" OR "Bayesian Networks" OR "Bayes Networks" OR "Bayesian Network" OR "Bayes Network" OR "Bayesian Networks" OR "Bayes Networks" OR "Bayes Theorem") |
| Europe PMC          | (TITLE:"Artificial Intelligence" OR TITLE:"machine learning" OR TITLE:"Deep Learning" OR TITLE:"Expert System" OR TITLE:"Data Mining" OR TITLE:"text mining" OR TITLE:"Big Data" OR TITLE:"Data Science" OR TITLE:"Data Analytics" OR TITLE:"Data driven" OR TITLE:"Bayesian" OR TITLE:"Bayes") AND (TITLE:"Primary Health Care" OR TITLE:"Primary Care" OR TITLE:"general practitioner" OR TITLE:"Family Practice" OR TITLE:"General Practice" OR TITLE:"primary healthcare" OR TITLE:"Community Medicine" OR TITLE:"Community Practice" OR                                                                                                                                                                                                                                                                                                                                                                                                                                                                                                                                                                                                                                                                                                                                                     |

| Database               | Query                                                                                                                                                                                                                                                                                                                                                                                                                                                                                                                                                                                                                                                                                                                                                                                                                                                                                                                                                                                                                                                                                                                                                                                                                                                                                                                                                                                                                                                                                                                                                                                                                                                                                                                                                                                                                                                                                                                                                                                                                                                                                                  |
|------------------------|--------------------------------------------------------------------------------------------------------------------------------------------------------------------------------------------------------------------------------------------------------------------------------------------------------------------------------------------------------------------------------------------------------------------------------------------------------------------------------------------------------------------------------------------------------------------------------------------------------------------------------------------------------------------------------------------------------------------------------------------------------------------------------------------------------------------------------------------------------------------------------------------------------------------------------------------------------------------------------------------------------------------------------------------------------------------------------------------------------------------------------------------------------------------------------------------------------------------------------------------------------------------------------------------------------------------------------------------------------------------------------------------------------------------------------------------------------------------------------------------------------------------------------------------------------------------------------------------------------------------------------------------------------------------------------------------------------------------------------------------------------------------------------------------------------------------------------------------------------------------------------------------------------------------------------------------------------------------------------------------------------------------------------------------------------------------------------------------------------|
|                        | <p>TITLE:"community physician" OR TITLE:"community nursing") AND (SRC:PPR)</p> <p>(TITLE:"Artificial Intelligence" OR TITLE:"machine learning" OR TITLE:"Deep Learning" OR TITLE:"Expert System" OR TITLE:"Data Mining" OR TITLE:"text mining" OR TITLE:"Big Data" OR TITLE:"Data Science" OR TITLE:"Data Analytics" OR TITLE:"Data driven" OR TITLE:"Bayesian" OR TITLE:"Bayes") AND (ABSTRACT:"Primary Health Care" OR ABSTRACT:"Primary Care" OR ABSTRACT:"general practitioner" OR ABSTRACT:"Family Practice" OR ABSTRACT:"General Practice" OR ABSTRACT:"primary healthcare" OR ABSTRACT:"Community Medicine" OR ABSTRACT:"Community Practice" OR ABSTRACT:"community physician" OR ABSTRACT:"community nursing") AND (SRC:PPR)</p> <p>(ABSTRACT:"Artificial Intelligence" OR ABSTRACT:"machine learning" OR ABSTRACT:"Deep Learning" OR ABSTRACT:"Expert System" OR ABSTRACT:"Data Mining" OR ABSTRACT:"text mining" OR ABSTRACT:"Big Data" OR ABSTRACT:"Data Science" OR ABSTRACT:"Data Analytics" OR ABSTRACT:"Data driven" OR ABSTRACT:"Bayesian" OR ABSTRACT:"Bayes") AND (TITLE:"Primary Health Care" OR TITLE:"Primary Care" OR TITLE:"general practitioner" OR TITLE:"Family Practice" OR TITLE:"General Practice" OR TITLE:"primary healthcare" OR TITLE:"Community Medicine" OR TITLE:"Community Practice" OR TITLE:"community physician" OR TITLE:"community nursing") AND (SRC:PPR)</p> <p>(ABSTRACT:"Artificial Intelligence" OR ABSTRACT:"machine learning" OR ABSTRACT:"Deep Learning" OR ABSTRACT:"Expert System" OR ABSTRACT:"Data Mining" OR ABSTRACT:"text mining" OR ABSTRACT:"Big Data" OR ABSTRACT:"Data Science" OR ABSTRACT:"Data Analytics" OR ABSTRACT:"Data driven" OR ABSTRACT:"Bayesian" OR ABSTRACT:"Bayes") AND (ABSTRACT:"Primary Health Care" OR ABSTRACT:"Primary Care" OR ABSTRACT:"general practitioner" OR ABSTRACT:"Family Practice" OR ABSTRACT:"General Practice" OR ABSTRACT:"primary healthcare" OR ABSTRACT:"Community Medicine" OR ABSTRACT:"Community Practice" OR ABSTRACT:"community physician" OR ABSTRACT:"community nursing") AND (SRC:PPR)</p> |
| Epistemonikos database | <p>((("Artificial Intelligence" OR "machine learning" OR "Artificial Intelligence" OR "Biological Ontologies" OR "Biological Ontology" OR "Computational Intelligence" OR "Computer Heuristics" OR "Computer Intelligence" OR "Computer Neural Network" OR "Computer Neural Networks" OR "Computer Reasoning" OR "Computer Vision System" OR "Computer Vision Systems" OR "Deep Learning" OR "Expert System" OR "Expert Systems" OR "Fuzzy Logic" OR "Hierarchical Learning" OR "Knowledge Base" OR "Knowledge Bases" OR "Machine Intelligence" OR "Machine Learning" OR "Natural Language Processing" OR "Robotic" OR "Robotics" OR "Supervised Machine Learning" OR "Support Vector Machine" OR "Support Vector Machines" OR "Unsupervised Machine Learning" OR "Knowledge Acquisition" OR "Knowledge Representation" OR "Neural Network" OR "Neural Networks" OR "Neural Network" OR "Data Mining" OR "Data Mining" OR "text mining" OR "Multifactor Dimensionality Reduction" OR "Big Data" OR "Big Data" OR "Data Science" OR "Data Science" OR "Data Sciences" OR "Data Analytics" OR "Data driven" OR "Bayesian Network" OR "Bayes Network" OR "Bayesian Networks" OR "Bayes Networks" OR "Bayesian Network" OR "Bayes Network" OR "Bayesian Networks" OR "Bayes Networks" OR "Bayes Theorem") AND ("Primary Health Care" OR "Primary Care Nursing" OR "general practitioner" OR "General Practitioners" OR "Family Practice" OR "General Practice" OR "primary healthcare" OR "Family Practice" OR "General</p>                                                                                                                                                                                                                                                                                                                                                                                                                                                                                                                                                                                |

| Database      | Query                                                                                                                                                                                                                                                                                                                                                                                                                                                                                                                                                                                                                                                                                                                                                                                                                                                                                                                                                                                                                                                                                                                                                                                                                                                                                                                                                                                                                                                                                                                                                                                                                                                                                                                                                                                                                                                                                                                                                                                                                                                                                                                                                                                                                                                                                                                                                                                                                                                                                                                                                                                                                                                                                                                                                                                                                                                                                                                                                                                                                                                                                                                                                                                                            |
|---------------|------------------------------------------------------------------------------------------------------------------------------------------------------------------------------------------------------------------------------------------------------------------------------------------------------------------------------------------------------------------------------------------------------------------------------------------------------------------------------------------------------------------------------------------------------------------------------------------------------------------------------------------------------------------------------------------------------------------------------------------------------------------------------------------------------------------------------------------------------------------------------------------------------------------------------------------------------------------------------------------------------------------------------------------------------------------------------------------------------------------------------------------------------------------------------------------------------------------------------------------------------------------------------------------------------------------------------------------------------------------------------------------------------------------------------------------------------------------------------------------------------------------------------------------------------------------------------------------------------------------------------------------------------------------------------------------------------------------------------------------------------------------------------------------------------------------------------------------------------------------------------------------------------------------------------------------------------------------------------------------------------------------------------------------------------------------------------------------------------------------------------------------------------------------------------------------------------------------------------------------------------------------------------------------------------------------------------------------------------------------------------------------------------------------------------------------------------------------------------------------------------------------------------------------------------------------------------------------------------------------------------------------------------------------------------------------------------------------------------------------------------------------------------------------------------------------------------------------------------------------------------------------------------------------------------------------------------------------------------------------------------------------------------------------------------------------------------------------------------------------------------------------------------------------------------------------------------------------|
|               | Practice" OR "primary care" OR "primary health care" OR "Family Physician" OR "Family Physicians" OR "Family Doctor" OR "Family Doctors" OR "General Practitioner" OR "General Practitioners" OR "General Practice Physician" OR "General Practice Physicians" OR "Primary Medical Care" OR "Family Healthcare" OR "Family Health Care" OR "Family Medicine" OR "Nurse Practitioner" OR "Nurse Practitioners" OR "Family Nurse" OR "Family Nurses" OR "Family Nursing" OR "Community Medicine" OR "Community Medicine" OR "Community Practice" OR "community physician" OR "community physicians" OR "community doctor" OR "community doctor" OR "community practitioner" OR "community practitioner" OR "community nurse" OR "community nurses" OR "community nursing"))                                                                                                                                                                                                                                                                                                                                                                                                                                                                                                                                                                                                                                                                                                                                                                                                                                                                                                                                                                                                                                                                                                                                                                                                                                                                                                                                                                                                                                                                                                                                                                                                                                                                                                                                                                                                                                                                                                                                                                                                                                                                                                                                                                                                                                                                                                                                                                                                                                        |
| PsycINFO      | TX(("Artificial Intelligence" OR "machine learning" OR "Artificial Intelligence" OR "Biological Ontologies" OR "Biological Ontology" OR "Computational Intelligence" OR "Computer Heuristics" OR "Computer Intelligence" OR "Computer Neural Network" OR "Computer Neural Networks" OR "Computer Reasoning" OR "Computer Vision System" OR "Computer Vision Systems" OR "Deep Learning" OR "Expert System" OR "Expert Systems" OR "Fuzzy Logic" OR "Hierarchical Learning" OR "Knowledge Base" OR "Knowledge Bases" OR "Machine Intelligence" OR "Machine Learning" OR "Natural Language Processing" OR "Robotic" OR "Robotics" OR "Supervised Machine Learning" OR "Support Vector Machine" OR "Support Vector Machines" OR "Unsupervised Machine Learning" OR "Knowledge Acquisition" OR "Knowledge Representation" OR "Neural Network" OR "Neural Networks" OR "Neural Network" OR "Data Mining" OR "Data Mining" OR "text mining" OR "Multifactor Dimensionality Reduction" OR "Big Data" OR "Big Data" OR "Data Science" OR "Data Science" OR "Data Sciences" OR "Data Analytics" OR "Data driven" OR "Bayesian Network" OR "Bayes Network" OR "Bayesian Networks" OR "Bayes Networks" OR "Bayesian Network" OR "Bayes Network" OR "Bayesian Networks" OR "Bayes Networks" OR "Bayes Theorem") AND ("Primary Health Care" OR "Primary Care Nursing" OR "general practitioner" OR "General Practitioners" OR "Family Practice" OR "General Practice" OR "primary healthcare" OR "Family Practice" OR "General Practice" OR "primary care" OR "primary health care" OR "Family Physician" OR "Family Physicians" OR "Family Doctor" OR "Family Doctors" OR "General Practitioner" OR "General Practitioners" OR "General Practice Physician" OR "General Practice Physicians" OR "Primary Medical Care" OR "Family Healthcare" OR "Family Health Care" OR "Family Medicine" OR "Nurse Practitioner" OR "Nurse Practitioners" OR "Family Nurse" OR "Family Nurses" OR "Family Nursing" OR "Community Medicine" OR "Community Medicine" OR "Community Practice" OR "community physician" OR "community physicians" OR "community doctor" OR "community doctor" OR "community practitioner" OR "community practitioner" OR "community nurse" OR "community nurses" OR "community nursing") AND ("Program Evaluation" OR "Evaluation Study" OR "Evaluation Studies as Topic" OR "Process Assessment" OR "Implementation Science" OR "Health Plan Implementation" OR "Pilot Projects" OR "Pilot Study" OR "Preliminary Data" OR "Adopting" OR "Adoption" OR "Assess" OR "Assessment" OR "Evaluation" OR "Evaluation studies" OR "Evaluation study" OR "Evaluations" OR "Implement" OR "Implementation" OR "pilot phase" OR "Pilot Studies" OR "Pilot Study" OR "Preliminary Data" OR "Process Assessments" OR "Process Assessment" OR "Process Measure" OR "Process Measures" OR "Program Appropriateness" OR "Program Assessments" OR "Program Assessment" OR "Program Effectiveness" OR "Program Evaluation" OR "Program Sustainability" OR "Programme Appropriateness" OR "Programme Assessment" OR "Programme Effectiveness" OR "Programme Evaluat*" OR "Programme Evaluation" OR "Programme Sustainability")) |
| GoogleScholar | "Artificial Intelligence" "machine learning" "Primary Health Care" "Primary Care" "general practitioner" "Family Practice" "General Practice" "primary healthcare" "Program                                                                                                                                                                                                                                                                                                                                                                                                                                                                                                                                                                                                                                                                                                                                                                                                                                                                                                                                                                                                                                                                                                                                                                                                                                                                                                                                                                                                                                                                                                                                                                                                                                                                                                                                                                                                                                                                                                                                                                                                                                                                                                                                                                                                                                                                                                                                                                                                                                                                                                                                                                                                                                                                                                                                                                                                                                                                                                                                                                                                                                      |

| Database | Query                                                                |
|----------|----------------------------------------------------------------------|
|          | Evaluation "Evaluation "Assessment "Implementation "Pilot "Adoption" |

## **eAppendix 2 –Selection Process**

Three reviewers (MMR, SK and MMvB) independently screened studies for inclusion and exclusion criteria based on title and abstract. All reviewers then screened the selected studies based on the full text. The reviewers discussed disagreements about the inclusion/exclusion of studies before being referred to an independent senior reviewer (HvO) until a consensus was reached. Summarising information about each predictive ML algorithm was generated by one reviewer (MMR). This included the year of publication, CE mark, or FDA approval, the authors' country of residence, the types of predictive ML algorithm (e.g., decision support, risk stratification, etc.), the study design, and the health condition addressed. This information was confirmed by the second reviewer (MMvB).

## eAppendix 3 – Online questionnaire for information from authors and commercial product owners

### **Towards improving access to evidence of prediction machine learning (ML) algorithms implemented in primary care: a scoping review**

#### Summary

AI has the potential to revolutionize the healthcare sector. Especially in primary care, where the setting may have a unique position to benefit from AI since the general practitioners have fewer diagnostic instruments or tests to diagnose or refer their patients. However, despite many technological developments, only a handful of AI applications have been implemented into clinical practice. As a result, the evidence base for the clinical effectiveness of these techniques is still sparse and inconsistent, hampering the trust in and adoption of AI in clinical settings. It is our belief that valuable examples of current AI applications help understand how qualitative and reliable AI could improve the quality of healthcare. Moreover, their scientific validation and market transparency can contribute to the safe and well-considered implementation of AI software.

Therefore, we conducted a scoping review with the aim to identify (the quality and reliability of) implemented AI in primary care. Commissioned by the Dutch Ministry of Health, researchers have published a guideline for high-quality AI in healthcare to discuss good professional conduct in the development, testing, and implementation of AI in the medical sector. In the appendix of this email, we have added the six phases with corresponding questions to each phase. We did not find all the information of your AI-model regarding those phases and would like to invite you to fill in the boxes with the appropriate information (if available). In this way, we hope that together we will aid in the transition from AI development to clinical implementation and through this boost adoption of effective, safe, and responsible clinical AI in primary care.

---

#### Details AI-system

1. Brief description of your AI-system: name, purpose/objective of the system and primary care function. \*

---

---

---

---

---

## Phase 1: Preparation and verification of the data

Phase 1 is about drawing up, managing and executing a data management plan. In this plan, agreements and procedures are laid down regarding the collection of required (meta) data, the storage of this (meta) data and its accessibility.

### 2. Is there a data management plan available? \*

- Yes, data management plan contains information about legal preconditions, data collection, metadata and data availability.
- Part of the data management plan is accessible.
- There is no data management plan.
- Unknown

### 3. Comment, clarification or explanation (access to publicly available reported evidence)

---

---

---

---

---

## Phase 2: Development of the AI-model

Phase 2 covers the development of the AI-model. The model is the set of algorithm-specific data structures that, in combination with an algorithm, forms the AI-model. Furthermore, it is the result of analysis of the training data.

The steps in this phase are:

- Definition of target use
- Analysis and modelling steps
- Internal validation
- Robustness
- Size of the dataset for AI model development
- Reproducibility and replicability

Definition of target use

1. Which medical or health process the AI-system is intended for?

It is mandatory to clarify at least the following in the intended that has been recorded:

- i) For which medical or health application the AI-model is intended (e.g. in which medical context, indication or target population) and who the envisaged end-user is (e.g. a specific specialization, primary care provider, or the patient, client or citizen himself);
- ii) Which medical or healthcare process the AI-model intends to influence and what the expected benefit is compared to the current process (e.g. faster diagnosis, improved estimate of a person's prognosis, or indication for modification of a lifestyle habit);
- iii) What the envisaged timing of the use of the AI-model or the prediction will be (e.g. upon admission to the hospital or Intensive Care Unit, at the time of receiving a cancer diagnosis, upon referral for a CT scan, or when symptoms or complaints are observed, or when monitoring blood sugar levels);
- iv) Whether this is a diagnostic, prognostic, monitoring, screening or other type of healthcare application;

2. Description of the origin of the dataset(s) for model development, data collection design, measurement and registration procedures.

4. Has the target been defined and reported? \*

- Yes, all of these requirements in this phase are included in the publication about development of the AI-model.
- Part of these requirements in this phase are included in the publication about development of the AI-model.
- Target use has not been defined and reported.  Unknown

5. Comment, clarification or explanation (access to publicly available reported evidence)

---

---

---

---

---



6. Has the origin of the dataset been described? \*

Yes, description of the origin of the dataset(s) for model development, data collection design, measurement and registration procedures have been mentioned.

There is some information about the origin of the dataset, but it has not been reported structurally.

There is no information about the origin of the dataset.

Unknown

7. Comment, clarification or explanation

---

---

---

---

---

Analysis and modeling steps

It is mandatory for the developer of the model to record all analysis and model development steps. This includes all preparatory steps (e.g. initial data analysis<sup>10</sup>, feature engineering), modelling technique used (e.g. neural network, random forest, time to event, logistic regression), all modelling steps (e.g. model selection, tuning, (re)calibration).

8. Have all modeling steps been mentioned? \*

Yes, all of the steps in this phase are included in a publication/document about development of the AI-model.

Part of these steps in this phase are included in a publication/document about development of the AI-model.

Modeling steps have not been reported.

Unknown

9. Comment, clarification or explanation

---

---

---

---

---

Internal validation

Internal validation is an important part of the process of development of the AI-model. The aim of the internal validation is to quantify realistic estimates of the model performance of the AI-model.

An adequate estimator of the model performance (e.g. the C(oncordance) statistic and calibration curve) can differ between types of applications and endpoints (e.g. binary, multi-category, time-to-event).

10. Has the internal validation process been clearly described? \*

- Yes, the AI-model internal validation has been described and was strictly separated from model development steps
- There is information about the internal validation process, but it is not strictly separated from model development steps.
- There is no information about the internal validation of the AI-model.
- Unknown

11. Comment, clarification or explanation (access to publicly available reported evidence)

---

---

---

---

---

## Robustness

During the development of the AI-model, it is mandatory to examine the technical robustness of the model and record the findings in a transparent manner, at least for those models that are used in the external validation (phase 3).

Various sensitivity analyses are recommended in order to study the robustness. This can include analyses of the:

- Architectural robustness: repetition of the analysis steps on the same data results in a model that does not deviate significantly from the original model.
- Consistency of model performance: repetition of the analysis steps on the same data results in models with performance that does not deviate much from the performance of the original AI-model.
- Adversarial robustness: the effect of a (deliberate) disruption on the input variables of the model on the performance and/or architecture.
- Domain shift and outliers: the effect of any outliers in the data and/or deliberate changes to the data set (e.g. deliberate inclusion or exclusion of certain groups) on the model performance and/or the architecture (e.g. outlier rejection analysis). Also refer to phase 4 and 6 for additional activities

12. Has the robustness of the model been investigated? \*

- Yes, an adequate sensitivity analysis has been performed
- There is some information about the sensitivity analysis, but it has not been described clearly.
- There is no information about an adequate sensitivity analysis.
- Unknown

13. Comment, clarification or explanation (access to publicly available reported evidence)

---

---

---

---

---

## Size of the dataset for AI-model development

The starting point for choosing the size of the dataset within model development is: the bigger, the better. However, this starting point must be weighed against medical-ethical considerations.

14. Has the size needed for AI-model development of the dataset been calculated? \*

- Yes, a calculation of the size of the dataset has been described (e.g. a priori or a posteriori method has been used to evaluate the minimal size of the dataset).
- There is information about the size of the dataset, but little information has been provided about the method of calculating this size.
- There is no information about the size of the dataset and its calculations.
- Unknown

15. Comment, clarification or explanation (access to publicly available reported evidence)

---

---

---

---

---

## Reproducibility and replicability

It is mandatory for all analysis steps and internal validation steps and the analysis of technical robustness to be logged accurately in order to guarantee the reproducibility (i.e. the ability to repeat the development using different data).

16. Have the steps of the internal validation been reported transparently? \*

- Yes, steps, procedures, and used data have been described transparently.
- Part of the steps of the internal validation has been reported transparently.
- There is no record of the steps of internal validation accessible.
- Unknown

17. Comment, clarification or explanation (access to publicly available reported evidence)

---

---

---

---

---

### Phase 3: Validation of the AI-model

Phase 3 consist of (external) validation of the AI-model developed in phase 2. External validation refers to the evaluation of the AI-model with data that has not been used for development in phase 2. Here, we appoint a difference between the evaluation of the statistical or predictive value, the evaluation of the (added) value compared to current care practice and the evaluation of fairness and algorithmic bias. External validation does explicitly not mean: the (re-)training or (re-)tuning of a model.

#### Evaluation of (statisical) characteristics of the AI-model

1. The dataset used for external validation is different to the development dataset, and is representative for the target population and context.
2. It is mandatory for an exact description of the origin of the data (e.g. time and place), the method of data collection (e.g. consecutive patients), measurement and registration procedures, any selections and inclusion and exclusion criteria to be recorded in the data management plan in order to define the context of the characteristics.

18. Is the dataset used for external validation clearly described in the documentation/publication? \*

- Yes, this has been clearly described.
- Partly described in the documentation/publication.
- There is no documentation/publication about the external validation.
- Unknown

19. Comment, clarification or explanation (access to publicly available reported evidence)

---

---

---

---

---

20. Has the origin of the dataset been described? \*

- Yes, description of the origin of the dataset(s) (other than the one used for internal validation), data collection design, measurement and registration procedures have been mentioned.
- There is some information about the origin of the dataset, but it has not been reported structurally.
- There is no information about the origin of the dataset.
- Unknown

21. Comment, clarification or explanation (access to publicly available reported evidence)

---

---

---

---

---

### Fairness and algorithmic bias

The external validation of the AI-model model should look beyond the model performance and medical value. The evaluation of fairness and bias is also very important.

22. Are fairness of the algorithm and the presence of different bias analysed and recorded? \*

- Yes, the fairness and biases have been clearly described.
- Part of the fairness and biases have been described.
- There is no information about the fairness and algorithmic bias.
- Unknown

23. Comment, clarification or explanation (access to publicly available reported evidence)

---

---

---

---

---

### Determining the outcome variable

The accurate determination of the outcome that is to be predicted in the external validation data set is an important factor for the validity of the statistical model performance and the medical value. There are many situations in medicine where no gold standard is available for the measurement of the outcome variable (e.g. for some diagnoses, classifications or cause specific mortality), which potentially result in misclassification of the outcome variable. Therefore, the term “reference standard” is often used. In some situations, evaluation by an expert or group of experts is required to arrive at a decision per case (e.g. the assessment of a tumour on a CT scan).

It is mandatory to perform so-called labelling of outcomes in the data set for external validation as accurately as possible in this phase and to record and justify this process as transparently as possible.

24. Has the definition and process of the labels transparently been described? \*

- Yes, outcome variables have been well described and considered.
- There is some information about the outcome variables, but the considerations are not transparently documented.
- There is no information about the determination of the outcome variables.
- Unknown

25. Comment, clarification or explanation (access to publicly available reported evidence)

---

---

---

---

---

### Reproducibility and replicability

As for phase 2, reproducibility and replicability are important guiding principles for external validation of the AI-model.

In order to guarantee reproducibility (i.e. repeat of the external validation using different data), it is mandatory to log the process that was followed and the data that was used for external validation in a complete and transparent manner, even in the case of negative results



26. Have the steps of the external validation been reported transparently? \*

- Yes, steps, procedures and used data have been described transparently.
- Part of the steps, procedures and used data have been described.
- There is no record of the steps of external validation accessible.
- Unknown

27. Comment, clarification or explanation (access to publicly available reported evidence)

---

---

---

---

---

#### Size of the dataset for external validation

The starting point for choosing the size of the dataset within model development is: the bigger, the better. The larger the data set, the more precise the estimates can be used for statistical and medical evaluation and testing of algorithmic bias.

28. Has the size of the dataset needed for validation been calculated? \*

- Yes, a calculating of the size of the dataset has been described (e.g. a priori or a posteriori method has been used to evaluate the minimal size of the dataset).
- There is information about the size of the dataset, but little information has been provided about the method of calculating this size.
- There is no information about the size of the dataset and its calculations.
- Unknown

29. Comment, clarification or explanation (access to publicly available reported evidence)

---

---

---

---

---

Phase 4: Development of the necessary software application

Phase 4 covers the development of the software around the AI-model by the manufacturer. That is, the design, development, user testing and associated system requirements for the software

Explainability, transparency, design and information

1. Explainable model
2. Complex (black box) algorithm

The outcomes of the AI-model will be presented in the software in a transparent and explainable manner. The presentation of the outcomes of the AI-model in the software distinguishes between an inherently explainable and a complex model.

30. What type of model is used? \*

- Explainable model *Ga naar vraag 32*
- Complex (black box) algorithm *Ga naar vraag 34*

31. Comment, clarification or explanation (access to publicly available reported evidence)

---

---

---

---

---



## Explainable model

In the case of an inherently explainable model, it is mandatory that the manufacturer discloses information about the interpretation of the model and the model predictions for the intended end-users.

32. Are the results of the AI-model presented in the software in a transparent and explainable manner? \*

- Yes, information on the interpretation of the AI-model are available for the intended end users in the presentation.
- There is information about the interpretation of the outcomes of the model, but is it not provided to all endusers.
- There is no explanation of the outcomes being formulated by the AI-model.  Unknown

33. Comment, clarification or explanation (access to publicly available reported evidence)

---

---

---

---

---

*Ga naar vraag 36*

## Complex (black box) algorithm

In the case of a complex model (e.g. an algorithm based on deep learning), the relationship between input variables and predicted outcomes is so complex that it is no longer possible to comprehend this (so-called “black box” algorithms). Extra attention should be paid to post-hoc information and interpretation of the model in the presentation of the model by the Software.

It is mandatory to substantiate the following aspects of complex models: 1) why an explainable model was not used and 2) if opting for a post-hoc explanation, why this is appropriate for the model and the intended end-user.

34. Are the results of the AI-model presented in the software in a transparent and explainable manner? \*

- Yes, explanation about 1) why the model isn't explainable, or 2) why a post-hoc explanation was chosen
- There is information about the interpretation of the outcomes of the model, but is it not provided to all endusers.
- There is no explanation of the outcomes being formulated by the AI-model.  Unknown

35. Comment, clarification or explanation (access to publicly available reported evidence)

---

---

---

---

---

## Phase 4 Development of the necessary software application

Testing

Existing software standards and regulations (e.g. IEC, ISO, FDA)

36. Are the required standards and regulations met (if applicable)? \*

- Yes, the software disposes of the required standards and regulations (if applicable).
- Part of the required standards and regulation have been met/described.
- The software doesn't meet the required standards and regulations.
- Unknown
- AI-model isn't in this phase yet

37. Comment, clarification or explanation (access to publicly available reported evidence)

---

---

---

---

---

Phase 5: Impact assessment of the AI-model in combination with the software

Phase 5 covers the determination of the impact or added value of the use of the AI-model as part of the software on the envisaged medical practice or context, the medical treatment and the health outcomes respectively for the intended group (e.g. the patient, client or citizen). A Health technology assessment is also performed during this phase. The manufacturer (or the developing care organization, in the event of internal development) is responsible for determining the impact and added value. Still, this process is generally performed in collaboration with developers, care organizations and end-users.

## Impact assessment

### 1. Expected effects on possible and relevant (health and process) outcomes.

In addition to the intended use that has been recorded, it is mandatory to record in more detail what the expected effects of the use of the AI-model are on possibly relevant (health and process) outcomes (in other words, define the intended use of the AI-model).

### 2. Risk assessment

It is mandatory to perform a risk assessment to gain insight into the potential risks of the use of the AI-model in daily medical practice.

This includes the expected unintended decisions and effects in the entire care process (refer to Section 5.1.1) and reasonably foreseeable incorrect use;

It is mandatory to create an inventory of the potential undesirable effects (risks) of implementation of the AI-model in the care process per component of the care process in the risk assessment, in close cooperation with the stakeholders (e.g. end-users and patients).

It is mandatory to select and implement risk-mitigating measures for the risks identified during the risk assessment.

It is mandatory to include any sources of uncertainty as listed in 5.3.1a in the risk assessment.

It is mandatory to incorporate any risks identified in the risk assessment in the outcomes of the empirical study (refer to Section 5.1.4).

### 3. Human-machine interaction

The effectiveness of the interaction of the end-user with the software is of great importance to the impact of the AI-model software.

It is mandatory to ensure that the AI-model software interfaces with the current medical care processes and accompanying medical decision making as seamlessly as possible before an empirical study is performed (refer to Figure 2 in Section 5.1.1).

It is mandatory to involve several end-users in the local implementation team in order to achieve this (also refer to phase 6 for the further composition of an implementation team). In addition, it is mandatory to create an inventory of the expected changes in the care context (e.g. changes in the work process) caused by the software, preferably in consultation with the intended user and patient, client or citizen.

### 4. (Comparative) study design

In order to ensure a valid quantification of the added benefit of the implementation of an AI-model in the context of the daily medical practices, it is mandatory to perform a comparative

study, in which the (desirable and undesirable) effects of the use of the AI-model (refer to Section 5.1.1) are compared to a similar context, in which similar standard care is performed, without the use of the AI-model.

38. Has an impact assessment been conducted? \*

- Yes, an impact assessment has been conducted.
- Part of an impact assessment has been conducted.
- No impact assessment has been conducted.
- Unknown
- AI-model isn't in this phase yet

39. Comment, clarification or explanation (access to publicly available reported evidence)

---

---

---

---

---

40. Has a risk assessment been carried out to identify the potential risks using the AI-model in daily medical practice. \*

- Yes, a risk assesment has been clearly described.
- No risk assesment has been described.
- Unknown
- AI-model isn't in this phase yet

41. Comment, clarification or explanation

---

---

---

---

---



42. Are all end-users involved in the implementation team? And does the AI model \* fit the current health processes and associated medical decision making?

- Yes, all end-users are involved in the implementation team. The the AI model fits the current health processes and is associated with the medical decision making?
- End-users are only involved at a later stage. Part of the suitability of the AI model in current health processes and decision making have been described.
- End-users were not involved in the implementation team.
- Unknown
- AI-model isn't in this phase yet

43. Comment, clarification or explanation (access to publicly available reported evidence)

---

---

---

---

---

44. The choice for a comparative study design must be carried out and \* substantiated (including the population/context in which it is carried out).

- Yes, a comparative study did take place and if not, there was a well-founded reason to use an other study design.
- No comparative study design was used, and the reason to provide an other study design was not clear and well-founded.
- No comparative study design was used, and the reason to provide an other study design wasn't mentioned either.
- Unknown
- AI-model isn't in this phase yet

45. Comment, clarification or explanation (access to publicly available reported evidence)

---

---

---

---

---

#### Health Technology Assessment (HTA)

It is strongly recommended that phase 5 includes a model-based impact analysis, or a model-based Technology Assessment (HTA).

In other words, a mathematical model (e.g. a Markov model) is used to provide an objective analysis of the expected costs and benefits (added value) of the introduction of the AI-model in

the medical practice compared to the current standard of care as benchmark or control. The result of such an HTA will become increasingly important in the approval of digital healthcare in the Netherlands and the EU. If reimbursement is essential, an appropriate HTA is thus required to be eligible for such reimbursement – or conditional reimbursement – of the implementation. T

46. Has a HTA been performed? \*

- Yes, a HTA was performed.
- No, a HTA was not performed.
- Unknown
- AI-model isn't in this phase yet

47. Comment, clarification or explanation (access to publicly available reported evidence)

---

---

---

---

---



## Phase 6: Implementation and use of the AI-model with software in daily practice

Phase 6 covers the implementation and use of the AI-model in clinical practice. Central themes in this phase are implementation, monitoring and education.

### Implementation plan

When an AI-model is implemented and applied within a care organisation, it is mandatory that the care organisation drafts an implementation plan.

An implementation plan includes both the technical implementation of the AI-model and the software in the existing (IT) infrastructure and the embedding of the use of the AI-model in existing work processes. Please refer to the Covenant on Medical Technology<sup>9</sup> and the Guideline New Interventions in Clinical Practice for a general guideline for implementation. As part of the local implementation process, it is mandatory to evaluate the reliability and applicability of the AI-model by means of an assessment of (the results of) previous studies performed as part of phase 3 and 5.

If these results provide an inadequate indication of the reliability and applicability of the AI-model

within the local context, additional validation of the AI-model can be performed (also refer to phase 3).

In addition, it is mandatory to introduce the AI-model – and the accompanying work process in which the AI-model is used – into the care process in a controlled manner, for example, in the form of a pilot, run-in period or by means of parallel implementation of the AI-model alongside the traditional care process.

It is mandatory to perform a prospective risk inventory (PRI) to gain insight into the potential risks of the use of the AI-model in daily medical practice.

**48.** Is there a implementationplan available that covers all the required components \*  
as described above?

- Yes, implementation plan meets the required components of an implementation plan.
- There is information about the implementation plan, but not all components have been described.
- No implemenation plan with the required components is available.
- Unknown
- AI-model isn't in this phase yet

49. Comment, clarification or explanation (access to publicly available reported evidence)

---

---

---

---

---

### Monitoring

The manufacturer and the healthcare institution monitor for technical errors in the AI-model and associated software, for misuse, for fairness and unexpected side effects of ordinary use of the software application in daily practice.

50. Is there a monitoring plan available that covers all the required components as \* described above?

- Yes, monitoring plan meets the required components of a monitoring plan.
- There is information about the monitoring plan, but not all components have been mentioned.
- No monitoring plan with the required components is available.
- Unknown
- AI-model isn't in this phase yet

51. Comment, clarification or explanation (access to publicly available reported evidence)

---

---

---

---

---



Education

It is mandatory that the end-user (e.g. a patient or the care provider) has access to information about the topics described in Box 6.1, to be supplied by the developer or manufacturer.

If the end-user is a care provider, it is mandatory that the care provider has access to education about the topics described in Box 6.2.

52. Are there education modules accessible for end users and/or healthcare institutions? \*

*Markeer slechts één ovaal.*

- Yes, there is education about the AI-model/software is accessible for end users and/or healthcare institutions.
- Partial support of education about the AI-model/software is accessible for end users and/or healthcare institutions.
- No education accessible.  Unknown
- AI-model isn't in this phase yet

53. Comment, clarification or explanation (access to publicly available reported evidence)

---

---

---

---

---

eTable 1 – The evidence requirements established per life cycle phase as described in the Dutch AIPA guideline

|                                                                 |              | Phase 1: Collection and management of |                                                                                                                                                                                                                                            | Phase 2: Development of the AI-model                                                                     |                                                                                                                                                              |                                                                                                 |                                                                                                                                                    |                                                                                                  |                                                                                                                                                                                                   |                                                                               | Phase 3: Validation of the AI-model          |                                                                                                                                                |                                                                                                                                                                                                                |                                                                                    |                                                                                                             |                                                                           |                                                                                                                                                                                                                                                    |
|-----------------------------------------------------------------|--------------|---------------------------------------|--------------------------------------------------------------------------------------------------------------------------------------------------------------------------------------------------------------------------------------------|----------------------------------------------------------------------------------------------------------|--------------------------------------------------------------------------------------------------------------------------------------------------------------|-------------------------------------------------------------------------------------------------|----------------------------------------------------------------------------------------------------------------------------------------------------|--------------------------------------------------------------------------------------------------|---------------------------------------------------------------------------------------------------------------------------------------------------------------------------------------------------|-------------------------------------------------------------------------------|----------------------------------------------|------------------------------------------------------------------------------------------------------------------------------------------------|----------------------------------------------------------------------------------------------------------------------------------------------------------------------------------------------------------------|------------------------------------------------------------------------------------|-------------------------------------------------------------------------------------------------------------|---------------------------------------------------------------------------|----------------------------------------------------------------------------------------------------------------------------------------------------------------------------------------------------------------------------------------------------|
| CRITERIA                                                        |              |                                       | Datamanagement plan                                                                                                                                                                                                                        | Definment target use                                                                                     | Analysis and modeling steps                                                                                                                                  | Internal validation                                                                             | Robustness                                                                                                                                         | Size of the dataset for AI-model development                                                     | Reproducibility and replicability                                                                                                                                                                 |                                                                               | Evaluation statistic properties the AI-model | Fairness and algorithmic bias                                                                                                                  | Determining the outcome variable                                                                                                                                                                               | Reproducibility and replicability                                                  | Size of the dataset for external validation                                                                 |                                                                           |                                                                                                                                                                                                                                                    |
| EXPLANATION (only requirements are obtained from the guideline) |              |                                       | Phase 1 is about drawing up, managing and executing a data management plan. In this plan, agreements and procedures are laid down regarding the collection of required (meta) data, the storage of this (meta) data and its accessibility. | Definment and record of a clear definition of the intended use of the AI model.                          | Description of the origin of the dataset(s) for model development, data collection design, measurement and registration procedures. If there                 | Recording of all preparation steps, modeling technique used, all modeling steps.                | Internal validation is a key step of the development process and refers to the realistic estimation of predictive performance in a separate group. | Sensitivity analysis                                                                             | The starting point for choosing the size of the dataset within model development is: the bigger, the better. However, this starting point must be weighed against medical-ethical considerations. | Steps and procedures of internal validation are documented transparently      |                                              | The dataset used for external validation is different to the development dataset, and is representative for the target population and context. | Description of the origin of the dataset(s) for model development, data collection design, measurement and registration procedures. If there are major differences between development and external validation | Fairness of the algorithm and the presence of different bias must be investigated. | Accurately determining the (predictable) outcome in the external validation dataset (labeling)              | Steps and procedures of external validation are documented transparently. | The starting point for choosing the size of the dataset within model development is: the bigger, the better. The larger the data set, the more precise the estimates can be used for statistical and medical evaluation and testing of algorithmic |
| QUESTION                                                        | Color coding | Values                                |                                                                                                                                                                                                                                            | Has the target been defined and reported?                                                                | Has the origin of the dataset been described?                                                                                                                | Have analysis and modeling steps been mentioned?                                                | Has the internal validation process been clearly                                                                                                   | Has the robustness of the model been investigated?                                               | Has the size needed for AI-model development of the dataset                                                                                                                                       | Have the steps of the internal validation been                                |                                              | Is this clearly described in the external validation documentati                                                                               | Has the origin of the dataset been described?                                                                                                                                                                  | Are fairness of the algorithm and the presence of different                        | Has the definition of the labels transparently been                                                         | Have the steps of the external validation been                            | Has the size of the dataset needed for validation been                                                                                                                                                                                             |
| No information / unknown                                        |              | 0                                     | Unknown                                                                                                                                                                                                                                    | Unknown                                                                                                  | Unknown                                                                                                                                                      | Unknown                                                                                         | Unknown                                                                                                                                            | Unknown                                                                                          | Unknown                                                                                                                                                                                           | Unknown                                                                       |                                              | Unknown                                                                                                                                        | Unknown                                                                                                                                                                                                        | Unknown                                                                            | Unknown                                                                                                     | Unknown                                                                   | Unknown                                                                                                                                                                                                                                            |
| Meets the criteria                                              |              | 2                                     | Yes, datamanagement plan contains information about legal preconditions, data collection, metadata and data availability.                                                                                                                  | Yes, all of these requirements in this phase are included in a report about development of the AI-model. | Yes, description of the origin of the dataset(s) for model development, data collection design, measurement and registration procedures have been mentioned. | Yes, all of the steps in this phase are included in a report about development of the AI-model. | Yes, the AI-model internal validation has been described and was strictly separated from model development steps                                   | Yes, an adequate sensitivity analysis has been performed                                         | Yes, a calculating of the size of the dataset has been described (e.g. a priori or a posteriori method has been used to evaluate the minimal size of the dataset).                                | Yes, steps, procedures and used data have been described transparently.       |                                              | Yes, this has been clearly described.                                                                                                          | Yes, description of the origin of the dataset(s) (other than the one used for internal validation), data collection design, measurement and registration procedures have been mentioned.                       | Yes, the fairness and biases have been clearly described.                          | Yes, outcome variables have been well described and considered.                                             | Yes, steps, procedures and used data have been described transparently.   | Yes, a calculating of the size of the dataset has been described (e.g. a priori or a posteriori method has been used to evaluate the minimal size of the dataset).                                                                                 |
| Partly meets the criteria                                       |              | 1                                     | Part of the datamanagement plan is accessible.                                                                                                                                                                                             | Part of these requirements in this phase are included in a report about development of the AI-model.     | There is some information about the origin of the dataset, but is has not been reported structurally.                                                        | Part of these steps in this phase are included in a report about development of the AI-model.   | There is information about the internal validation process, but it is not strictly separated from model development steps.                         | There is some information about the sensitivity analysis, but is has not been described clearly. | There is information about the size of the dataset, but little information has been provided about the method of calculating                                                                      | Part of the steps of the internal validation has been reported transparently. |                                              | Partly described in the documentati on/publication.                                                                                            | There is some information about the origin of the dataset, but is has not been reported structurally.                                                                                                          | Part of the fairness and biases have been described.                               | There is information about the outcome variables, but the considiration s are not transparently documented. | Part of the steps, procedures and used data have been described.          | There is information about the size of the dataset, but little information has been provided about the method of calculating                                                                                                                       |



|                                                                 |              |        | Phase 4: Development of the necessary software application                                                          |                                                                                      | Phase 5: Impact assessment of the AI-model in combination with the software |                                                                                                                                                                                                                                        |                                                                  |                                                                                                                                                                |                                                                                                                      | Phase 6: Implementation and use of the AI-model with software in daily practice |  |                                                                                                                                                  |                                                                                                                                                                                                               |                                                                                                                      |
|-----------------------------------------------------------------|--------------|--------|---------------------------------------------------------------------------------------------------------------------|--------------------------------------------------------------------------------------|-----------------------------------------------------------------------------|----------------------------------------------------------------------------------------------------------------------------------------------------------------------------------------------------------------------------------------|------------------------------------------------------------------|----------------------------------------------------------------------------------------------------------------------------------------------------------------|----------------------------------------------------------------------------------------------------------------------|---------------------------------------------------------------------------------|--|--------------------------------------------------------------------------------------------------------------------------------------------------|---------------------------------------------------------------------------------------------------------------------------------------------------------------------------------------------------------------|----------------------------------------------------------------------------------------------------------------------|
| CRITERIA                                                        |              |        | Explainability, transparency, design and information                                                                | Testing                                                                              |                                                                             | Impact assessment                                                                                                                                                                                                                      |                                                                  |                                                                                                                                                                |                                                                                                                      | Health Technology Assessment (HTA)                                              |  | Implementation plan                                                                                                                              | Monitoring                                                                                                                                                                                                    | Education                                                                                                            |
| EXPLANATION (only requirements are obtained from the guideline) |              |        | Explainable model                                                                                                   | Existing software standards and regulations (e.g. IEC, ISO, FDA)                     |                                                                             | Expected effects on possible and relevant (health and process) outcomes                                                                                                                                                                | Risk assessment                                                  | Human-machine interaction                                                                                                                                      | (Comparative) study design                                                                                           | Analysis of anticipated costs and benefits.                                     |  | Consist of: a technical implementation plan, accompanying work process, prospective risk-inventarisation, and drafting of an implementation-team | The manufacturer and the healthcare institution monitor for technical errors in the AI-model and associated software, for fairness and unexpected side effects of ordinary use of the software application in | Education about the AI-model/software for end users and healthcare institutions                                      |
| QUESTION                                                        | Color coding | Values | Are the results of the AI-model presented in the software                                                           | Are the required standards and regulations                                           |                                                                             | Have the expected decisions by the end-user, and the                                                                                                                                                                                   | Has a risk assessment been carried out to identify the potential | Are all endusers involved in the implementation                                                                                                                | The choice for a comparative study design must be                                                                    | Is there a HTA done?                                                            |  | Is there a implementation plan available that cover all the                                                                                      | Is there a monitoringsplan available that cover all the required                                                                                                                                              | Are there education modules accessible for end users                                                                 |
| No information / unknown                                        |              | 0      | Unknown                                                                                                             | Unknown                                                                              |                                                                             | Unknown                                                                                                                                                                                                                                | Unknown                                                          | Unknown                                                                                                                                                        | Unknown                                                                                                              | Unknown                                                                         |  | Unknown                                                                                                                                          | Unknown                                                                                                                                                                                                       | Unknown                                                                                                              |
| Meets the criteria                                              |              | 2      | Yes, explanation about 1) why the model isn't explainable, or 2) why a post-hoc explanation was chosen              | Yes, the software disposes of the required standards and regulations (if necessary). |                                                                             | Yes, the expected decisions by the end-user, and the expected effects and consequences of the decisions on later (health) outcomes of the patient, client, citizen and/or on the local care context or on society have been described. | Yes, a risk assessment has been clearly described.               | Yes, all end users are involved in the implementation team. The AI-model fits the current health processes and is associated with the medical decision making. | Yes, a comparative study did take place and if not, there was a well-founded reason to use another study design.     | Yes, a HTA was done.                                                            |  | Yes, implementation plan meets the required components of an implementation plan.                                                                | Yes, monitoringsplan meets the required components of a monitoringplan.                                                                                                                                       | Yes, there is education about the AI-model/software is accessible for end users and/or healthcare institutions.      |
| Partly meets the criteria                                       |              | 1      | There is information about the interpretation of the outcomes of the model, but is it not provided to all endusers. | Part of the required standards and regulation have been met/described.               |                                                                             | Part of the expected decisions by the end-user, and the expected effects and consequences of the decisions on later (health) outcomes of                                                                                               | Part of a risk assessment has been conducted.                    | Part of the end users are involved. Part of the suitability of the AI-model in current health processes and decision making have been                          | No comparative study design was used, and the reason to provide another study design was not clear and well-founded. | No proper HTA was performed, but cost calculations were done.                   |  | There is information about the implementation plan, but not all components have been described.                                                  | There is information about the monitoringsplan, but not all components have been mentioned.                                                                                                                   | Partial support of education about the AI-model/software is accessible for end users and/or healthcare institutions. |

**eFigure – Flowchart of literature inclusion for assessment of the six phases**

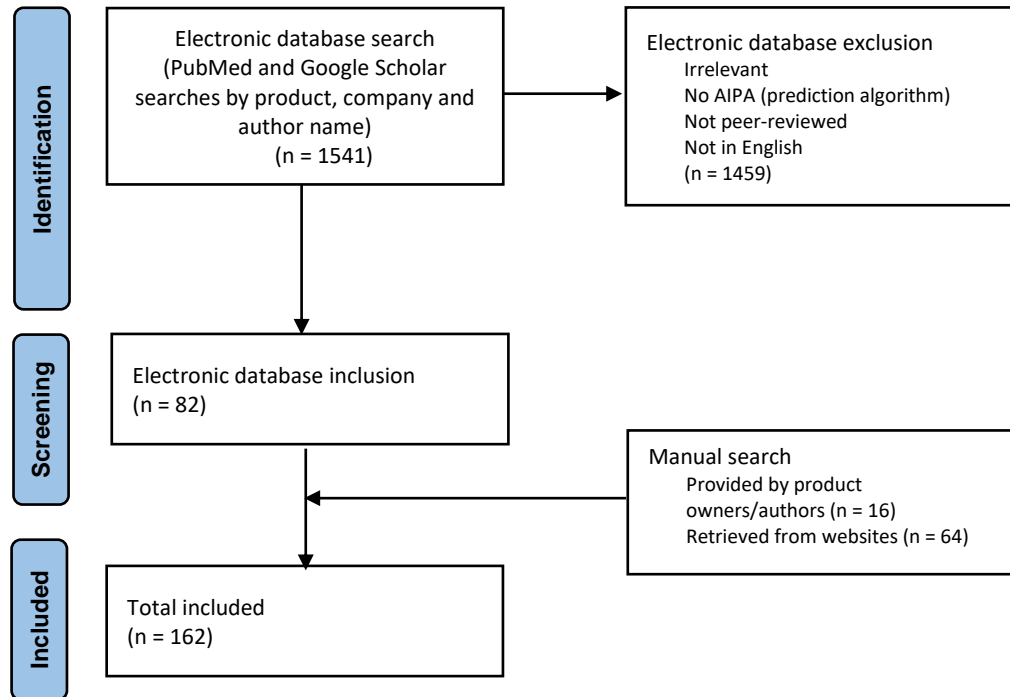

**eTable 2 – Overview of publication characteristics per predictive ML algorithm**

| <b>Predictive ML algorithm</b>    | <b>Product</b> | <b>Publication</b>                                                                                                                                                                                              | <b>doi</b>                                                | <b>source</b>       | <b>first author</b> | <b>year</b> | <b>source</b>                                          | <b>center corresponding author</b>                  |
|-----------------------------------|----------------|-----------------------------------------------------------------------------------------------------------------------------------------------------------------------------------------------------------------|-----------------------------------------------------------|---------------------|---------------------|-------------|--------------------------------------------------------|-----------------------------------------------------|
| AIFRED (D. Benrimoh et al., 2021) | -              | Aifred Health, a Deep Learning Powered Clinical Decision Support System for Mental Health                                                                                                                       | 10.1007/978-3-319-94042-7_13                              | electronic database | D. Benrimoh         | 2018        | The NIPS '17 Competition: Building Intelligent Systems | University College London, London, UK               |
| AIFRED (D. Benrimoh et al., 2021) | -              | Analysis of Features Selected by a Deep Learning Model for Differential Treatment Selection in Depression                                                                                                       | 10.3389%2Ffrontiersin.2019.00031                          | electronic database | J. Mehltrerrer      | 2019        | Frontiers in Artificial Intelligence                   | University of Southern California, Los Angeles, USA |
| AIFRED (D. Benrimoh et al., 2021) | -              | Differential Treatment Benefit Prediction for Treatment Selection in Depression: A Deep Learning Analysis of STAR*D and CO-MED Data                                                                             | 10.1162/cpsy_a_00029                                      | electronic database | J. Mehltrerrer      | 2020        | Computational Psychiatry                               | University of Southern California, Los Angeles, USA |
| AIFRED (D. Benrimoh et al., 2021) | -              | Evaluating the Clinical Feasibility of an Artificial Intelligence–Powered, Web-Based Clinical Decision Support System for the Treatment of Depression in Adults: Longitudinal Feasibility Study                 | <a href="https://doi.org/10.2196/31862">10.2196/31862</a> | electronic database | C. Popescu          | 2021        | JMIR Formative Research                                | Aifred Health Inc., Montreal, Canada                |
| AIFRED (D. Benrimoh et al., 2021) | -              | Evaluating the Usability and Impact of an Artificial Intelligence-Powered Clinical Decision Support System for Depression Treatment                                                                             | 10.1016/j.biopsych.2020.02.451                            | electronic database | M. Tanguay-Sela     | 2020        | Biological Psychiatry                                  | Aifred Health Inc., Montreal, Canada                |
| AIFRED (D. Benrimoh et al., 2021) | -              | Evaluating the perceived utility of an artificial intelligence-powered clinical decision support system for depression treatment using a simulation center                                                      | 10.1016/j.psychres.2021.114336                            | electronic database | M. Tanguay-Sela     | 2021        | Psychiatry Research                                    | Aifred Health Inc., Montreal, Canada                |
| AIFRED (D. Benrimoh et al., 2021) | -              | Using a simulation centre to evaluate preliminary acceptability and impact of an artificial intelligence-powered clinical decision support system for depression treatment on the physician-patient interaction | 10.1192/bjo.2020.127                                      | electronic database | D. Benrimoh         | 2021        | BJPsych Open                                           | University College London, London, UK               |

| <b>Predictive ML algorithm</b>      | <b>Product</b> | <b>Publication</b>                                                                                                                                                   | <b>doi</b>                   | <b>source</b>       | <b>first author</b> | <b>year</b> | <b>source</b>                                                    | <b>center corresponding author</b>                               |
|-------------------------------------|----------------|----------------------------------------------------------------------------------------------------------------------------------------------------------------------|------------------------------|---------------------|---------------------|-------------|------------------------------------------------------------------|------------------------------------------------------------------|
| AIFRED (D. Benrimoh et al., 2021)   | -              | A Mixed-Methods Feasibility Study of a Novel AI-Enabled, Web-Based, Clinical Decision Support System for the Treatment of Major Depression in Adults                 | 10.1101/2022.01.14.22269265  | electronic database | S. Qassim           | 2022        | BMJ Yale                                                         | University of Waterloo, Canada                                   |
| No name (EW Breithart et al., 2020) | -              | Improved patient satisfaction and diagnostic accuracy in skin diseases with a Visual Clinical Decision Support System—A feasibility study with general practitioners | 10.1371/journal.pone.0235410 | electronic database | Breithart           | 2020        | PLoS One                                                         | Association of Dermatological Prevention (ADP), Hamburg, Germany |
| A-GPS (HY Seol et al., 2021)        | -              | Assessing socioeconomic bias in machine learning algorithms in health care: a case study of the HOUSES index                                                         | 10.1093/jamia/ocac052        | electronic database | Young J Juhn        | 2022        | Journal of the American Medical Informatics Association          | Mayo Clinic, USA                                                 |
| A-GPS (HY Seol et al., 2021)        | -              | A Technical Performance Study and Proposed Systematic and Comprehensive Evaluation of an ML-based CDS Solution for Pediatric Asthma                                  | Abstract                     | author              | Young J Juhn        | 2022        | AMAI 2022 Informatics Summit                                     | Mayo Clinic, USA                                                 |
| A-GPS (HY Seol et al., 2021)        | -              | Artificial intelligence-assisted clinical decision support for childhood asthma management: A randomized clinical trial                                              | 10.1371/journal.pone.0255261 | electronic database | Hee Yun Seol        | 2021        | PLoS One                                                         | Mayo Clinic, USA                                                 |
| No name (E Frontoni et al., 2020)   | -              | A Decision Support System for Diabetes Chronic Care Models Based on General Practitioner Engagement and EHR Data Sharing                                             | 10.1109/JTEHM.2020.3031107   | electronic database | Emanuele Frontoni   | 2020        | IEEE Journal of Translational Engineering in Health and Medicine | University of Politecnica, Italy                                 |
| No name (E Frontoni et al., 2020)   | -              | A Shared Decision-Making System for Diabetes Medication Choice Utilizing Electronic Health Record Data                                                               | 10.1109/JBHI.2016.2614991    | electronic database | Yu Wang             | 2017        | IEEE Journal of Biomedical and Health Informatics                | Zhejiang University, Hangzhou, China                             |

| <b>Predictive ML algorithm</b>                                     | <b>Product</b> | <b>Publication</b>                                                                                                                                                                                               | <b>doi</b>                         | <b>source</b>       | <b>first author</b> | <b>year</b> | <b>source</b>                                     | <b>center corresponding author</b>                                                                                           |
|--------------------------------------------------------------------|----------------|------------------------------------------------------------------------------------------------------------------------------------------------------------------------------------------------------------------|------------------------------------|---------------------|---------------------|-------------|---------------------------------------------------|------------------------------------------------------------------------------------------------------------------------------|
| No name (E Frontoni et al., 2020)                                  | -              | Development of a Service-Oriented Sharable Clinical Decision Support System Based on Ontology for Chronic Disease                                                                                                | 10.3233/978-1-61499-830-3-1153     | electronic database | Yong Shang          | 2017        | Studies in Health Technology and Informatics      | Zhejiang University, Hangzhou, China                                                                                         |
| No name (P Bachtiger et al., 2022)                                 | -              | Screening for cardiac contractile dysfunction using an artificial intelligence-enabled electrocardiogram                                                                                                         | 10.1038/s41591-018-0240-2          | electronic database | Zachi I. Attia      | 2019        | Nature Medicine                                   | Mayo Clinic, Rochester, USA                                                                                                  |
| No name (P Bachtiger et al., 2022)                                 | -              | Point-of-care screening for heart failure with reduced ejection fraction using artificial intelligence during ECG-enabled stethoscope examination in London, UK: a prospective, observational, multicentre study | 10.1016/S2589-7500(21)00256-9      | electronic database | Bachtiger           | 2022        | Lancet Digital Health                             | Imperial College Healthcare NHS Trust, London, UK                                                                            |
| No name (Y Kanagasingam et al., 2018) Retinopathy in Primary Care" | -              | Lappeenranta University of Technology Diabetic Retinopathy Database and Evaluation Protocol                                                                                                                      | -                                  | electronic database | Tomi Kauppi         | 2009        | Machine Vision and Pattern Recognition Laboratory | Lappeenranta University of Technology                                                                                        |
| No name (Y Kanagasingam et al., 2018) Retinopathy in Primary Care" | -              | Kaggle Diabetic Retinopathy Database.                                                                                                                                                                            | -                                  | electronic database | -                   | -           | -                                                 | -                                                                                                                            |
| No name (Y Kanagasingam et al., 2018) Retinopathy in Primary Care" | -              | Evaluation of Artificial Intelligence-Based Grading of Diabetic Retinopathy in Primary Care                                                                                                                      | 10.1001/jama-networkopen.2018.2665 | electronic database | Kanagasingam        | 2019        | JAMA Network Open                                 | Australian e-Health Research Centre, Commonwealth Scientific and Industrial Research Organisation, Perth, Western Australia, |

| Predictive ML algorithm     | Product | Publication                                                                                                                                                                                     | doi                                                                                     | source              | first author          | year | source                             | center corresponding author                                                                    |
|-----------------------------|---------|-------------------------------------------------------------------------------------------------------------------------------------------------------------------------------------------------|-----------------------------------------------------------------------------------------|---------------------|-----------------------|------|------------------------------------|------------------------------------------------------------------------------------------------|
|                             |         |                                                                                                                                                                                                 |                                                                                         |                     |                       |      |                                    | Australia                                                                                      |
| EyeArt (J Liu et al., 2021) | -       | Development and Validation of a Deep Learning Algorithm for Detection of Diabetic Retinopathy in Retinal Fundus Photographs                                                                     | 10.1001/jama.2016.17216                                                                 | electronic database | Varun Gulshan         | 2016 | Innovation in Health Care Delivery | Google Inc, Mountain View, California                                                          |
| EyeArt (J Liu et al., 2021) | -       | Automated Diabetic Retinopathy Image Assessment Software: Diagnostic Accuracy and Cost-Effectiveness Compared with Human Graders                                                                | 10.1016/j.ophtaha.2016.11.014                                                           | electronic database | Adnan Tufail          | 2016 | Ophthalmology                      | Moorfields Eye Hospital, London, UK                                                            |
| EyeArt (J Liu et al., 2021) | -       | An observational study to assess if automated diabetic retinopathy image assessment software can replace one or more steps of manual imaging grading and to determine their cost-effectiveness. | <a href="https://doi.org/10.3310/hta20920">10.3310/hta20920</a>                         | electronic database | Tufail A.             | 2016 | Health Technology Assessment       | University College London Institute of Ophthalmology.                                          |
| EyeArt (J Liu et al., 2021) | -       | The Value of Automated Diabetic Retinopathy Screening with the EyeArt System: A Study of More Than 100,000 Consecutive Encounters from People with Diabetes                                     | <a href="https://doi.org/10.1089%2Fdiabetes.2019.0164">10.1089%2Fdiabetes.2019.0164</a> | electronic database | Malavika Bhaskaranand | 2019 | Diabetes Technology & Therapeutics | Eyenuk California                                                                              |
| EyeArt (J Liu et al., 2021) | -       | Performance of a Deep-Learning Algorithm vs Manual Grading for Detecting Diabetic Retinopathy in India                                                                                          | 10.1001/jamaophthalmol.2019.2004                                                        | electronic database | Varun Gulshan         | 2019 | JAMA Ophthalmology                 | Google Inc, Mountain View, California                                                          |
| EyeArt (J Liu et al., 2021) | -       | Pivotal Evaluation of an Artificial Intelligence System for Autonomous Detection of Referrable and Vision-Threatening Diabetic Retinopathy                                                      | 10.1001/jamanetworkopen.2021.34254                                                      | website             | Eli Ipp               | 2021 | JAMA Network Open                  | Eyenuk California                                                                              |
| EyeArt (J Liu et al., 2021) | -       | Diabetic Retinopathy Screening with Automated Retinal Image Analysis in a Primary Care Setting Improves Adherence to Ophthalmic Care                                                            | 10.1016/j.oret.2020.06.016                                                              | electronic database | Liu                   | 2021 | Ophthalmology Retina               | Department of Ophthalmology and Visual Sciences, Washington University School of Medicine, St. |

| <b>Predictive ML algorithm</b>         | <b>Product</b> | <b>Publication</b>                                                                                                                     | <b>doi</b>                     | <b>source</b>       | <b>first author</b> | <b>year</b> | <b>source</b>                                           | <b>center corresponding author</b>                    |
|----------------------------------------|----------------|----------------------------------------------------------------------------------------------------------------------------------------|--------------------------------|---------------------|---------------------|-------------|---------------------------------------------------------|-------------------------------------------------------|
|                                        |                |                                                                                                                                        |                                |                     |                     |             |                                                         | Louis, Missouri                                       |
| No name (J Long et al., 2016)          | -              | An Observational Study to Evaluate the Usability and Intent to Adopt an Artificial Intelligence-Powered Medication Reconciliation Tool | 10.2196/ijmr.5462              | electronic database | Long                | 2016        | Interactive Journal of Medical Research                 | Texas State University , San Marcos, TX, US           |
| No name (S Romero-Brufau et al., 2020) | -              | A lesson in implementation: A pre-post study of providers' experience with artificial intelligence-based clinical decision support     | 10.1016/j.ijmedinf.2019.104072 | electronic database | Romero-Brufau       | 2020        | International Journal of Medical Informatics            | Mayo Clinic, Minnesota, United States                 |
| No name (HY Seol et al., 2021)         | -              | Artificial intelligence-assisted clinical decision support for childhood asthma management: A randomized clinical trial                | 10.1371/journal.pone.0255261   | electronic database | Seol                | 2021        | PLoS One                                                | Mayo Clinic, Minnesota, United States                 |
| No name (SM Overgaard et al., 2022)    | -              | A Technical Performance Study and Proposed Systematic and Comprehensive Evaluation of an ML-based CDS Solution for Pediatric Asthma    | -                              | author              | Overgaard           | 2022        | AMIA Annual Symposium Proceedings Archive               | Mayo Clinic, Rochester, Minnesota                     |
| No name (SM Overgaard et al., 2022)    | -              | Assessing socioeconomic bias in machine learning algorithms in health care: a case study of the HOUSES index                           | 10.1093/jamia/ocac052          | author              | Juhn                | 2022        | Journal of the American Medical Informatics Association | Mayo Clinic, Rochester, Minnesota                     |
| PULsE-AI (NR Hill et al., 2022)        | -              | Data Resource Profile: Clinical Practice Research Datalink (CPRD)                                                                      | 10.1093/ije/dyav098            | electronic database | Emily Herrett       | 2015        | International journal of epidemiology                   | London, UK                                            |
| PULsE-AI (NR Hill et al., 2022)        | -              | Predicting atrial fibrillation in primary care using machine learning                                                                  | 10.1371/journal.pone.0224582   | author              | Nathan R. Hill      | 2019        | PLoS One                                                | Bristol-Myers Squibb Pharmaceutical Ltd, Uxbridge, UK |

| <b>Predictive ML algorithm</b>     | <b>Product</b> | <b>Publication</b>                                                                                                                                                                                            | <b>doi</b>                   | <b>source</b>       | <b>first author</b> | <b>year</b> | <b>source</b>                              | <b>center corresponding author</b>                                                                  |
|------------------------------------|----------------|---------------------------------------------------------------------------------------------------------------------------------------------------------------------------------------------------------------|------------------------------|---------------------|---------------------|-------------|--------------------------------------------|-----------------------------------------------------------------------------------------------------|
| PULsE-AI (NR Hill et al., 2022)    | -              | Detecting undiagnosed atrial fibrillation in UK primary care: Validation of a machine learning prediction algorithm in a retrospective cohort study                                                           | 10.1177/2047487320942338     | author              | Sara Sekelj         | 2020        | European Journal of Preventive Cardiology  | Imperial College Health Partners, London, UK                                                        |
| PULsE-AI (NR Hill et al., 2022)    | -              | Identification of undiagnosed atrial fibrillation using a machine learning risk prediction algorithm and diagnostic testing (PULsE-AI) in primary care: a multi-centre randomised controlled trial in England | 10.1093/ehjdh/ztac009        | electronic database | Nathan R. Hill      | 2022        | European Heart Journal Digital Health      | Bristol-Myers Squibb Pharmaceutical Ltd, Uxbridge, UK                                               |
| No name (WE Herter et al., 2022)   | -              | Impact of a Machine Learning–Based Decision Support System for Urinary Tract Infections: Prospective Observational Study in 36 Primary Care Practices                                                         | 10.2196/27795                | electronic database | Herter              | 2022        | JMIR Medical Informatics                   | Department of Public Health and Primary Care, Leiden University Medical Center, Leiden, Netherlands |
| No name (Y Wu et al., 2023)        | -              | Interpretable Machine Learning Models for Clinical Decision-Making in a High-Need, Value-Based Primary Care Setting                                                                                           | 10.1056/CAT.21.0008          | electronic database | Bhatt               | 2021        | NEJM Catalyst Innovations in Care Delivery | Oak Street Health, Chicago, Illinois, USA                                                           |
| CUHAS-ROBUST (H Bumi et al., 2022) | -              | Development and performance of CUHAS-ROBUST application for pulmonary rifampicin-resistance tuberculosis screening in Indonesia                                                                               | 10.1371/journal.pone.0249243 | electronic database | Bumi Herman         | 2021        | PLoS One                                   | Chulalongkorn University, Bangkok, Thailand                                                         |
| CUHAS-ROBUST (H Bumi et al., 2022) | -              | Artificial intelligence in overcoming rifampicin resistant-screening challenges in Indonesia: a qualitative study on the user experience of CUHAS-ROBUST                                                      | 10.1108/JHR-11-2020-0535     | electronic database | Bumi Herman         | 2021        | Journal of Health Research                 | Chulalongkorn University, Bangkok, Thailand                                                         |
| No name (S Wnag et al., 2019)      | -              | Stepped-wedge randomised trial to evaluate population health intervention designed to increase appropriate anticoagulation in patients with atrial fibrillation                                               | 10.1136/bmjqs-2019-009367    | electronic database | Wang                | 2022        | BMJ Quality & Safety                       | Harvard Medical School, Boston, Massachusetts,                                                      |



| Predictive ML algorithm                                                                         | Product | Publication                                                                                                                                           | doi                                                                       | source              | first author     | year | source                           | center corresponding author     |
|-------------------------------------------------------------------------------------------------|---------|-------------------------------------------------------------------------------------------------------------------------------------------------------|---------------------------------------------------------------------------|---------------------|------------------|------|----------------------------------|---------------------------------|
|                                                                                                 |         |                                                                                                                                                       |                                                                           |                     |                  |      |                                  | USA                             |
| Firstderm (A Escalé-Besa et al., 2022) in primary care: feasibility study in clinical practice) | -       | Evaluation of the Diagnostic Accuracy of an Online Artificial Intelligence Application for Skin Disease Diagnosis                                     | 10.2340/00015555-3624                                                     | author              | Zaar             | 2020 | Acta Dermato Venereologica       | University of Gothenburg        |
| Firstderm (A Escalé-Besa et al., 2022) in primary care: feasibility study in clinical practice) | -       | Using artificial intelligence on dermatology conditions in Uganda: a case for diversity in training data sets for machine learning                    | 10.4314/ahs.v23i2.86                                                      | author              | Kamulegeya       | 2023 | African Health Sciences          | Sahlgrenska University Hospital |
| MEDO-Hip (JL Jeremko et al., 2023)                                                              |         | Traditional 510(k) Premarket Notification – MEDO Dx. - 510(k) Summary                                                                                 | -                                                                         | Electronic database | Dornoosh Zonoobi | 2020 | Technical report                 | Singapore                       |
| MEDO-Hip (JL Jeremko et al., 2023)                                                              | -       | Automated diagnosis of hip dysplasia from 3D ultrasound using artificial intelligence: A two-center multi-year study                                  | 10.1016/j.imu.2022.101082                                                 | electronic database | Ghassemi nia     | 2022 | Informatics in Medicine Unlocked | University of Alberta           |
| MEDO-Hip (JL Jeremko et al., 2023)                                                              | -       | Interobserver Variability of Hip Dysplasia Indices on Sweep Ultrasound for Novices, Experts, and Artificial Intelligence                              | 10.1097/BPO.0000000000002065                                              | electronic database | Ghassemi nia     | 2022 | Journal of Pediatric Orthopedics | University of Alberta           |
| MEDO-Hip (JL Jeremko et al., 2023)                                                              | -       | Remote diagnostic imaging using artificial intelligence for diagnosing hip dysplasia in infants: Results from a mixed-methods feasibility pilot study | 10.1093/pch/pxad013                                                       | electronic database | Libon            | 2023 | Paediatrics Child Health         | University of Alberta           |
| P3.AI (PH Chiang et al.,                                                                        | -       | Personalized Effect of Health Behavior on Blood Pressure: Machine Learning Based Prediction and                                                       | <a href="https://doi.org/10.1109/Healt">https://doi.org/10.1109/Healt</a> | electronic          | Chiang           | 2018 | 2018 IEEE 20th International     | University of California at     |

| Predictive ML algorithm        | Product | Publication                                                                                                           | doi                                                                                                                     | source              | first author | year | source                                                                   | center corresponding author                    |
|--------------------------------|---------|-----------------------------------------------------------------------------------------------------------------------|-------------------------------------------------------------------------------------------------------------------------|---------------------|--------------|------|--------------------------------------------------------------------------|------------------------------------------------|
| 2021)                          |         | Recommendation                                                                                                        | <a href="https://doi.org/10.1109/ACC.2019.2939218">hCom.2018.8531109</a>                                                | database            |              |      | Conference on e-Health Networking, Applications and Services (Healthcom) | San Diego La Jolla                             |
| P3.AI (PH Chiang et al., 2021) | -       | Offline and Online Learning Techniques for Personalized Blood Pressure Prediction and Health Behavior Recommendations | <a href="https://doi.org/10.1109/ACC.2019.2939218">https://doi.org/10.1109/ACC.2019.2939218</a>                         | electronic database | Chiang       | 2019 | IEEE Access                                                              | University of California at San Diego La Jolla |
| P3.AI (PH Chiang et al., 2021) | -       | Using Wearables and Machine Learning to Enable Personalized Lifestyle Recommendations to Improve Blood Pressure       | <a href="https://doi.org/10.1109/JTEHM.2021.3098173">https://doi.org/10.1109/JTEHM.2021.3098173</a>                     | electronic database | Chiang       | 2021 | IEEE Journal of Translational Engineering in Health and Medicine         | University of California at San Diego La Jolla |
| P3.AI (PH Chiang et al., 2021) | -       | An mHealth Lifestyle Intervention Service for Improving Blood Pressure using Machine Learning and IoMTs               | <a href="https://doi.org/10.1109/ICDH.2022.0055609.2022.00030">https://doi.org/10.1109/ICDH.2022.0055609.2022.00030</a> | electronic database | Leitner      | 2022 | 2022 IEEE International Conference on Digital Health (ICDH)              | University of California at San Diego La Jolla |
| EAGLE (X Yao et al., 2020)     | -       | Screening for cardiac contractile dysfunction using an artificial intelligence-enabled electrocardiogram              | <a href="https://doi.org/10.1038/s41591-018-0240-2">https://doi.org/10.1038/s41591-018-0240-2</a>                       | electronic database | Attia        | 2019 | Nature Medicine                                                          | Mayo Clinic, Rochester                         |
| EAGLE (X Yao et al., 2020)     | -       | Prospective validation of a deep learning ECG algorithm for the detection of left ventricular systolic dysfunction    | <a href="https://doi.org/10.1111/jce.13889">https://doi.org/10.1111/jce.13889</a>                                       | electronic database | Attia        | 2019 | Journal of Cardiovascular Electrophysiology                              | Mayo Clinic, Rochester                         |
| EAGLE (X Yao et al., 2020)     | -       | The Effects of Race and Ethnicity on a Deep Learning Model for ECG Analysis                                           | <a href="https://doi.org/10.1161/CIRC.EP.119.007988">https://doi.org/10.1161/CIRC.EP.119.007988</a>                     | electronic database | Noseworthy   | 2020 | Circulation: Arrhythmia and Electrophysiology                            | Mayo Clinic, Rochester                         |

| <b>Predictive ML algorithm</b> | <b>Product</b> | <b>Publication</b>                                                                                                                                                        | <b>doi</b>                                                                                          | <b>source</b>       | <b>first author</b> | <b>year</b> | <b>source</b>                                     | <b>center corresponding author</b>  |
|--------------------------------|----------------|---------------------------------------------------------------------------------------------------------------------------------------------------------------------------|-----------------------------------------------------------------------------------------------------|---------------------|---------------------|-------------|---------------------------------------------------|-------------------------------------|
| EAGLE (X Yao et al., 2020)     | -              | Artificial intelligence-enabled electrocardiograms for identification of patients with low ejection fraction: a pragmatic, randomized clinical trial                      | <a href="https://doi.org/10.1038/s41591-021-01335-4">https://doi.org/10.1038/s41591-021-01335-4</a> | electronic database | Yao                 | 2021        | Nature Medicine                                   | Mayo Clinic, Rochester              |
| EAGLE (X Yao et al., 2020)     | -              | Cost Effectiveness of an Electrocardiographic Deep Learning Algorithm to Detect Asymptomatic Left Ventricular Dysfunction                                                 | <a href="https://doi.org/10.1016/j.jacc.2020.11.032">https://doi.org/10.1016/j.jacc.2020.11.032</a> | electronic database | Tseng               | 2021        | Mayo Clinic Proceedings                           | Mayo Clinic, Rochester              |
| EAGLE (X Yao et al., 2020)     | -              | Real-world performance, long-term efficacy, and absence of bias in the artificial intelligence enhanced electrocardiogram to detect left ventricular systolic dysfunction | <a href="https://doi.org/10.1093/ehjdh/ztac028">https://doi.org/10.1093/ehjdh/ztac028</a>           | electronic database | Harmon              | 2022        | European Heart Journal - Digital Health           | Mayo Clinic, Rochester              |
| EAGLE (X Yao et al., 2020)     | -              | Provider Perspectives on Artificial Intelligence-Guided Screening for Low Ejection Fraction in Primary Care: Qualitative Study                                            | <a href="https://doi.org/10.2196/41940">https://doi.org/10.2196/41940</a>                           | electronic database | Barry               | 2022        | JMIR AI                                           | Mayo Clinic, Rochester              |
| EAGLE (X Yao et al., 2020)     | -              | Clinician Adoption of an Artificial Intelligence Algorithm to Detect Left Ventricular Systolic Dysfunction in Primary Care.                                               | <a href="https://doi.org/10.1016/j.jacc.2022.04.008">https://doi.org/10.1016/j.jacc.2022.04.008</a> | electronic database | Rushlow             | 2022        | Mayo Clinic Proceedings                           | Mayo Clinic, Rochester              |
| EAGLE (X Yao et al., 2020)     | -              | Prospective evaluation of smartwatch-enabled detection of left ventricular dysfunction                                                                                    | <a href="https://doi.org/10.1038/s41591-022-02053-1">https://doi.org/10.1038/s41591-022-02053-1</a> | electronic database | Attia               | 2022        | Nature Medicine                                   | Mayo Clinic, Rochester              |
|                                |                |                                                                                                                                                                           |                                                                                                     |                     |                     |             |                                                   |                                     |
| Medicine                       | Stetsee pro    | Heart Sound Segmentation Using Bidirectional LSTMs With Attention                                                                                                         | 10.1109/JBHI.2019.2949516                                                                           | electronic database | Tharindu Fernando   | 2019        | IEEE Journal of Biomedical and Health Informatics | Queensland University of Technology |
| Medicine                       | Stetsee pro    | Robust and Interpretable Temporal Convolution Network for Event Detection in Lung Sound Recordings                                                                        | 10.1109/JBHI.2022.3144314.                                                                          | electronic database | Tharindu Fernando   | 2022        | IEEE Journal of Biomedical and Health Informatics | Queensland University of Technology |

| Predictive ML algorithm | Product     | Publication                                                                                                                                                | doi                                                                                                                         | source              | first author        | year | source                                     | center corresponding author          |
|-------------------------|-------------|------------------------------------------------------------------------------------------------------------------------------------------------------------|-----------------------------------------------------------------------------------------------------------------------------|---------------------|---------------------|------|--------------------------------------------|--------------------------------------|
| Medicine                | Stethee pro | Automatic segmentation and classification of cardiac cycles using deep learning and a wireless electronic stethoscope                                      | 10.1109/LSC.2017.8268180                                                                                                    | electronic database | Houman Ghaemmaghami | 2017 | IEEE Life Sciences Conference              | Queensland University of Technology  |
| Medicine                | Stethee pro | Traditional 510(k) Premarket Notification - M3DICINE Pty Ltd. - 510(k) Summary                                                                             | -                                                                                                                           | Electronic database | Ginger Cantor,      | 2020 | Technical report                           | Australia                            |
| RootiMedical            | Rooti Rx    | Traditional 510(k) Premarket Notification Rooti Rx System ECG Event Recorder. - 510(k) Summary                                                             | -                                                                                                                           | Electronic database | Sue Chuang          | 2016 | Technical report                           | Taipei                               |
| RootiMedical            | Rooti Rx    | The quality of ECG data acquisition, and diagnostic performance of a novel adhesive patch for ambulatory cardiac rhythm monitoring in arrhythmia detection | 10.1016/j.jelecardiac.2019.02.012                                                                                           | electronic database | M. Remzi Karaoguz   | 2019 | Journal of Electrocardiology               | Koç University Hospital, Istanbul    |
| RootiMedical            | Rooti Rx    | Screening of obstructive sleep apnea in patients who snore using a patch-type device with electrocardiogram and 3-axis accelerometer                       | 10.5664/jcsm.8462#d1e401                                                                                                    | electronic database | Ying-Shuo Hsu       | 2020 | Journal of Clinical Sleep Medicine         | Shin Kong Wu-Ho-Su Memorial Hospital |
| DigitalDiagnosics       | ID-Dx       | Improved Automated Detection of Diabetic Retinopathy on a Publicly Available Dataset Through Integration of Deep Learning                                  | 10.1167/iovs.16-19964                                                                                                       | website             | M. Abramoff         | 2016 | Investigate Ophthalmology & Visual science | University of Iowa                   |
| DigitalDiagnosics       | ID-Dx       | Validation of automated screening for referable diabetic retinopathy with the IDx-DR device in the Hoorn Diabetes Care System                              | 10.1111%2Fao.13613                                                                                                          | website             | A. van der Heijden  | 2017 | Acta Ophthalmologica                       | VUMC, The Netherlands                |
| DigitalDiagnosics       | ID-Dx       | Pivotal trial of an autonomous AI-based diagnostic system for detection of diabetic retinopathy in primary care offices                                    | 10.1038/s41746-018-0040-6                                                                                                   | website             | M. Abramoff         | 2018 | Nature                                     | University of Iowa                   |
| DigitalDiagnosics       | ID-Dx       | Traditional 510(k) Premarket Notification – Idx-DR - 510(k) Summary                                                                                        | <a href="https://www.accessdata.fda.gov/cdrh_docs/reviews/DEN18">https://www.accessdata.fda.gov/cdrh_docs/reviews/DEN18</a> | Electronic database | M. Abramoff         | 2018 | Technical report                           | -                                    |

| Predictive ML algorithm | Product | Publication                                                                                                                                               | doi                           | source  | first author       | year | source                                     | center corresponding author             |
|-------------------------|---------|-----------------------------------------------------------------------------------------------------------------------------------------------------------|-------------------------------|---------|--------------------|------|--------------------------------------------|-----------------------------------------|
|                         |         |                                                                                                                                                           | 0001.pdf                      |         |                    |      |                                            |                                         |
| DigitalDiagnostics      | ID-Dx   | Diagnostic Accuracy of a Device for the Automated Detection of Diabetic Retinopathy in a Primary Care Setting                                             | 10.2337/dc18-0148             | website | F. Verbraak        | 2019 | American Diabetes Association              | VUMC, The Netherlands                   |
| DigitalDiagnostics      | ID-Dx   | A pilot autonomous AI-based DR screening in Poland                                                                                                        | 10.1111/j.1755-3768.2019.5078 | website | Andrzej Grzybowski | 2019 | Acta Ophthalmologica                       | University of Warmia and Mazury, Poland |
| DigitalDiagnostics      | ID-Dx   | A Framework to Evaluate Ethical Considerations with ML-HCA Applications—Valuable, Even Necessary, but Never Comprehensive                                 | 10.1080/15265161.2020.1827695 | website | Danton Char        | 2020 | The American Journal of Bioethics          | Stanford University School of Medicine  |
| DigitalDiagnostics      | ID-Dx   | Automated and Computer-Assisted Detection, Classification, and Diagnosis of Diabetic Retinopathy                                                          | 10.1089/tmj.2020.0008         | website | M. Abramoff        | 2020 | American Telemedicine Association          | University of Iowa                      |
| DigitalDiagnostics      | ID-Dx   | Practice Guidelines for Ocular Telehealth-Diabetic Retinopathy, Third Edition                                                                             | 10.1089/tmj.2020.0006         | website | M. Horton          | 2020 | American Telemedicine Association          | Phoenix, Arizona                        |
| DigitalDiagnostics      | ID-Dx   | Validation of Automated Screening for Referable Diabetic Retinopathy With an Autonomous Diagnostic Artificial Intelligence System in a Spanish Population | 10.1177/1932296820906212      | website | Abhay Shah         | 2020 | Journal of Diabetes Science and Technology | IA, USA                                 |
| DigitalDiagnostics      | ID-Dx   | Identifying Ethical Considerations for Machine Learning Healthcare Applications                                                                           | 10.1080/15265161.2020.1819469 | author  | Danton Char        | 2020 | The American Journal of Bioethics          | Stanford University School of Medicine  |
| DigitalDiagnostics      | ID-Dx   | Lessons Learned About Autonomous AI: Finding a Safe, Efficacious, and Ethical Path Through the Development Process                                        | 10.1016/j.ajo.2020.02.022     | website | M. Abramoff        | 2020 | American Journal of Ophthalmology          | University of Iowa                      |

| <b>Predictive ML algorithm</b> | <b>Product</b> | <b>Publication</b>                                                                                                                               | <b>doi</b>                                                                                                                          | <b>source</b>       | <b>first author</b> | <b>year</b> | <b>source</b>                              | <b>center corresponding author</b>          |
|--------------------------------|----------------|--------------------------------------------------------------------------------------------------------------------------------------------------|-------------------------------------------------------------------------------------------------------------------------------------|---------------------|---------------------|-------------|--------------------------------------------|---------------------------------------------|
| DigitalDiagnos-<br>tics        | ID-Dx          | Cost-effectiveness of Autonomous Point-of-Care Diabetic Retinopathy Screening for Pediatric Patients With Diabetes                               | 10.1001/jamaophthalmol.2020.3190                                                                                                    | author              | Risa M. Wolf        | 2020        | JAMA Ophthalmology                         | Johns Hopkins School of Medicine, Baltimore |
| DigitalDiagnos-<br>tics        | ID-Dx          | Autonomous Artificial Intelligence in Diabetic Retinopathy: From Algorithm to Clinical Application                                               | 10.1177/1932296820909900                                                                                                            | website             | Roomasa Channa      | 2021        | Journal of Diabetes Science and Technology | Houston, TX, USA                            |
| DigitalDiagnos-<br>tics        | ID-Dx          | Foundational Considerations for Artificial Intelligence Using Ophthalmic Images                                                                  | 10.1016/j.ophtaha.2021.08.023                                                                                                       | website             | M. Abramoff         | 2021        | American Journal of Ophthalmology          | University of Iowa                          |
| DigitalDiagnos-<br>tics        | ID-Dx          | A reimbursement framework for Artificial Intelligence in Healthcare                                                                              | 10.1038/s41746-022-00621-w                                                                                                          | author              | M. Abramoff         | 2022        | Nature Digital Medicine, in press          | University of Iowa                          |
| DigitalDiagnos-<br>tics        | ID-Dx          | Lessons Learned About Autonomous AI: Finding a Safe, Efficacious, and Ethical Path Through the Development Process                               | 10.1016/j.ajo.2020.02.022                                                                                                           | author              | M. Abramoff         | 2022        | Article in press                           | University of Iowa                          |
| Qompium NV                     | FibriCheck     | Validation of a smartphone based photoplethysmographic beat detection algorithm for normal and ectopic complexes                                 | Conference                                                                                                                          | website             | L. Drijkonin gen    | 2014        | Computing in Cardiology                    | Hasselt University, Belgium                 |
| Qompium NV                     | FibriCheck     | Clinical Validation of Heart Rate Apps: Mixed-Methods Evaluation Study                                                                           | 10.2196/mhealth.7254                                                                                                                | website             | T. Vandenberg       | 2017        | JMIR mHealth and uHealth                   | Ziekenhuis Oost-Limburg, Belgium            |
| Qompium NV                     | FibriCheck     | Traditional 510(k) Premarket Notification – Idx-DR - 510(k) Summary                                                                              | <a href="https://www.accessdata.fda.gov/cdrh_docs/pdf17/K173872.pdf">https://www.accessdata.fda.gov/cdrh_docs/pdf17/K173872.pdf</a> | Electronic database | Patsy Trisler       | 2018        | Technical report                           | Maryland                                    |
| Qompium NV                     | FibriCheck     | Performance of an artificial intelligence algorithm to detect atrial fibrillation on a 24-hour continuous photoplethysmography recording using a | <a href="https://doi.org/10.1093/eurheartj/ehab724.0">https://doi.org/10.1093/eurheartj/ehab724.0</a>                               | website             | H. Gruwez           | 2021        | European Heart Journal                     | University of Leuven, Belgium               |

| Predictive ML algorithm | Product     | Publication                                                                                                                                                                               | doi                                                                       | source              | first author     | year | source                   | center corresponding author                 |
|-------------------------|-------------|-------------------------------------------------------------------------------------------------------------------------------------------------------------------------------------------|---------------------------------------------------------------------------|---------------------|------------------|------|--------------------------|---------------------------------------------|
|                         |             | smartwatch: ACURATE study                                                                                                                                                                 | <a href="#">489</a>                                                       |                     |                  |      |                          |                                             |
| Cardio-Phoenix          | Cardio-HART | Unraveling diagnostic co-morbidity makeup of each HF category as 2 characteristically derived by ECG- and ECHO-findings, a 3 prevalence analysis                                          | 10.1101/2021.09.30.21264236v1                                             | electronic database | Azfar Zaman      | 2021 | BMJ Yale                 | Newcastle University                        |
| CSD Labs GmbH           | eMurmur     | REDUCING INAPPROPRIATE USE OF ECHOCARDIOGRAPHY IN CHILDREN: SCREENING HEART MURMURS WITH AN AI WITH ENABLED STETHOSCOPE                                                                   | <a href="https://hvpaa.org/conference/">https://hvpaa.org/conference/</a> | website             | Christine Kuryla | 2019 | Conference               | Johns Hopkins School of Medicine, Baltimore |
| CSD Labs GmbH           | eMurmur     | Computerized Automatic Diagnosis of Innocent and Pathologic Murmurs in Pediatrics: A Pilot Study                                                                                          | 10.1111/chd.12328                                                         | website             | Lilian S W Lai   | 2016 | Congenital Heart Disease | Ottawa, Canada                              |
| CSD Labs GmbH           | eMurmur     | Artificial Intelligence-Assisted Auscultation of Heart Murmurs: Validation by Virtual Clinical Trial                                                                                      | 10.1007/s00246-018-2036-z                                                 | website             | W. Reid Thompson | 2018 | Pediatric Cardiology     | Johns Hopkins Children's Center             |
| CSD Labs GmbH           | eMurmur     | IMPLEMENTATION AND UTILITY OF A PHONE-BASED APPLICATION FOR TEACHING AUSCULTATION SKILLS TO INCOMING PEDIATRIC CARDIOLOGY FELLOWS                                                         | 10.1016/j.acap.2020.06.070                                                | website             | Inger Olson      | 2020 | Academic Pediatrics      | Stanford University, USA                    |
| CSD Labs GmbH           | eMurmur     | Use of Telemedicine with An Artificial Intelligence-Enabled Stethoscope to Support Decision-Making and Reduce Inappropriate Use of Echocardiography in Children with Heart Murmurs        | 10.1542/peds.147.3MA10.989a                                               | website             | W. Reid Thompson | 2021 | Pediatrics (abstract)    | Johns Hopkins Children's Center             |
| CSD Labs GmbH           | eMurmur     | Feasibility of using an artificial intelligence-enabled stethoscope and telemedicine to improve referrals and reduce inappropriate use of echocardiography in children with heart murmurs | Conference                                                                | website             | Christine Kuryla | 2021 | Conference               | Johns Hopkins School of Medicine, Baltimore |

| <b>Predictive ML algorithm</b>          | <b>Product</b>                    | <b>Publication</b>                                                                                             | <b>doi</b>                                                                                                                          | <b>source</b>       | <b>first author</b> | <b>year</b> | <b>source</b>       | <b>center corresponding author</b>          |
|-----------------------------------------|-----------------------------------|----------------------------------------------------------------------------------------------------------------|-------------------------------------------------------------------------------------------------------------------------------------|---------------------|---------------------|-------------|---------------------|---------------------------------------------|
| CSD Labs GmbH                           | eMurmur                           | Feasibility assessment of AI-assisted home-based remote auscultation to optimize echocardiogram referrals      | Poster                                                                                                                              | website             | Jessica Campanile   | 2021        | Poster presentation | Johns Hopkins School of Medicine, Baltimore |
| CSD Labs GmbH                           | eMurmur                           | Traditional 510(k) Premarket Notification – Idx-DR - 510(k) Summary                                            | <a href="https://www.accessdata.fda.gov/cdrh_docs/pdf22/K220766.pdf">https://www.accessdata.fda.gov/cdrh_docs/pdf22/K220766.pdf</a> | Electronic database | Allison Komiyama    | 2022        | Technical report    | San Diego, California                       |
| Hefei Mintti Medical Technology Co. Ltd | Smartho-D2 Electronic Stethoscope | Cardiac Sound Localization and Identification Method for Electronic Stethoscope                                | 10.1109/ICSPCC.2018.8567742                                                                                                         | author              | Ning Zhou           | 2018        | IEEE                | Soochow University, China                   |
| Hefei Mintti Medical Technology Co. Ltd | Smartho-D2 Electronic Stethoscope | Detection of Adventitious Respiratory Sounds based on Convolutional Neural Network                             | 10.1109/ICIIBMS46890.2019.8991459                                                                                                   | author              | Renyu Liu           | 2019        | IEEE                | Soochow University, China                   |
| Hefei Mintti Medical Technology Co. Ltd | Smartho-D2 Electronic Stethoscope | The Automatic Repairing Method Addressing Clipping Distortions and Frictional Noises in Electronic Stethoscope | 10.1109/ICBCB.2019.8854669                                                                                                          | author              | Ning Zhou           | 2019        | IEEE                | Soochow University, China                   |
| Hefei Mintti Medical Technology Co. Ltd | Smartho-D2 Electronic Stethoscope | Traditional 510(k) Premarket Notification – Electronic Stethoscope – smartho-D2 - 510(k) Summary               | <a href="https://www.accessdata.fda.gov/cdrh_docs/pdf19/K191667.pdf">https://www.accessdata.fda.gov/cdrh_docs/pdf19/K191667.pdf</a> | Electronic database | Shengshen Cai       | 2019        | Technical report    |                                             |



| Predictive ML algorithm                 | Product                           | Publication                                                                                                                                                                                                      | doi                             | source  | first author     | year | source                                    | center corresponding author            |
|-----------------------------------------|-----------------------------------|------------------------------------------------------------------------------------------------------------------------------------------------------------------------------------------------------------------|---------------------------------|---------|------------------|------|-------------------------------------------|----------------------------------------|
|                                         | ope                               |                                                                                                                                                                                                                  |                                 |         |                  |      |                                           |                                        |
| Hefei Mintti Medical Technology Co. Ltd | Smartho-D2 Electronic Stethoscope | Machine-Learning Learning-based Aortic Stenosis Detection for Electronic Stethoscope                                                                                                                             | 10.1109/WCS P52459.2021.9613207 | author  | Zhen Shi         | 2021 | IEEE                                      | Soochow University, China              |
| Eko Devices Inc.                        | EKO Analysis Software             | Real-World Evaluation of the Eko Electronic Teleauscultation System                                                                                                                                              | 10.1007/s00246-018-1972-y       | website | Shashank Behere  | 2018 | Pediatric Cardiology                      | Hospital for Children, Wilmington, USA |
| Eko Devices Inc.                        | EKO Analysis Software             | Prospective Analysis of Utility of Signals From an Ecg-Enabled Stethoscope to Automatically Detect a Low Ejection Fraction Using Neural Network Techniques Trained From the Standard 12-Lead Ecg                 | Abstract                        | website | Z.I. Attia       | 2019 | Circulation                               | Mayo Clinic, USA                       |
| Eko Devices Inc.                        | EKO Analysis Software             | Screening for cardiac contractile dysfunction using an artificial intelligence-enabled electrocardiogram                                                                                                         | 10.1038/s41591-018-0240-2       | website | Z.I. Attia       | 2019 | Nature Medicine                           | Mayo Clinic, USA                       |
| Eko Devices Inc.                        | EKO Analysis Software             | Deep Learning Algorithm for Automated Cardiac Murmur Detection via a Digital Stethoscope Platform                                                                                                                | 10.1161/JAHA.120.019905         | website | John S Chorba    | 2021 | Journal of the American Heart Association | University of California, USA          |
| Eko Devices Inc.                        | EKO Analysis Software             | Point-of-care screening for heart failure with reduced ejection fraction using artificial intelligence during ECG-enabled stethoscope examination in London, UK: a prospective, observational, multicentre study | 10.1016/S2589-7500(21)00256-9   | website | Patrik Bachtiger | 2022 | The Lancet Digital Health                 | Imperial College London, London, UK    |

| <b>Predictive ML algorithm</b> | <b>Product</b>        | <b>Publication</b>                                                                                                                                                                              | <b>doi</b>                                                                    | <b>source</b>       | <b>first author</b>     | <b>year</b> | <b>source</b>                         | <b>center corresponding author</b>                    |
|--------------------------------|-----------------------|-------------------------------------------------------------------------------------------------------------------------------------------------------------------------------------------------|-------------------------------------------------------------------------------|---------------------|-------------------------|-------------|---------------------------------------|-------------------------------------------------------|
| Eko Devices Inc.               | EKO Analysis Software | Automated Detection of Low Ejection Fraction from a One-lead Electrocardiogram: Application of an AI algorithm to an ECG-enabled Digital Stethoscope                                            | 10.1093/ehjdh/ztac030                                                         | website             | Z.I. Attia              | 2022        | European Heart Journal Digital Health | Mayo Clinic, USA                                      |
| Eko Devices Inc.               | EKO Analysis Software | Traditional 510(k) Premarket Notification – CORE 500 Digital Stehoscope - 510(k) Summary                                                                                                        | accessdata.fda.gov/cdrh_docs/pdf23/K230111.pdf                                | Electronic database | Sam Huang               | 2023        | Technical report                      | Oakland, California                                   |
| KOSMOS                         | EchoNous              | Traditional 510(k) Premarket Notification – Kosmos- 510(k) Summary                                                                                                                              | accessdata.fda.gov/cdrh_docs/pdf21/K212100.pdf                                | Electronic database | Prithul Bom             | 2021        | Technical report                      | Saint Paul                                            |
| KOSMOS                         | EchoNous              | Clinical validation of an artificial intelligence-assisted algorithm for automated quantification of left ventricular ejection fraction in real time by a novel handheld ultrasound device      | 10.1093/ehjdh/ztac001                                                         | Electronic database | Stella-Lida Papadopolou | 2022        | European Heart Journal                | Papageorgiou General Hospital (Greece)                |
| Eyenuk Inc.                    | EyeArt                | Development and Validation of a Deep Learning Algorithm for Detection of Diabetic Retinopathy in Retinal Fundus Photographs                                                                     | <a href="https://doi.org/10.1001/jama.2016.17216">10.1001/jama.2016.17216</a> | Electronic database | Varun Gulshan           | 2016        | Jama Network Open                     | Eyenuk California                                     |
| Eyenuk Inc.                    | EyeArt                | Automated Diabetic Retinopathy Image Assessment Software: Diagnostic Accuracy and Cost-Effectiveness Compared with Human Graders                                                                | 10.1016/j.optha.2016.11.014                                                   | Electronic database | Adnan Tufail            | 2016        | Ophthalmology                         | Moorfields Eye Hospital, London, UK                   |
| Eyenuk Inc.                    | EyeArt                | An observational study to assess if automated diabetic retinopathy image assessment software can replace one or more steps of manual imaging grading and to determine their cost-effectiveness. | <a href="https://doi.org/10.3310/hta20920">10.3310/hta20920</a>               | Electronic database | Tufail A.               | 2016        | Health Technology Assessment          | University College London Institute of Ophthalmology. |

| <b>Predictive ML algorithm</b> | <b>Product</b>      | <b>Publication</b>                                                                                                                                          | <b>doi</b>                                                                              | <b>source</b>       | <b>first author</b>   | <b>year</b> | <b>source</b>                      | <b>center corresponding author</b>            |
|--------------------------------|---------------------|-------------------------------------------------------------------------------------------------------------------------------------------------------------|-----------------------------------------------------------------------------------------|---------------------|-----------------------|-------------|------------------------------------|-----------------------------------------------|
| Eyenuk Inc.                    | EyeArt              | The Value of Automated Diabetic Retinopathy Screening with the EyeArt System: A Study of More Than 100,000 Consecutive Encounters from People with Diabetes | <a href="https://doi.org/10.1089%2Fdiabetes.2019.0164">10.1089%2Fdiabetes.2019.0164</a> | electronic database | Malavika Bhaskaranand | 2019        | Diabetes Technology & Therapeutics | Eyenuk California                             |
| Eyenuk Inc.                    | EyeArt              | Performance of a Deep-Learning Algorithm vs Manual Grading for Detecting Diabetic Retinopathy in India                                                      | 10.1001/jamaophthalmol.2019.2004                                                        | electronic database | Varun Gulshan         | 2019        | JAMA Ophthalmology                 | Google Inc, Mountain View, California         |
| Eyenuk Inc.                    | EyeArt              | Traditional 510(k) Premarket Notification – EyeArt- 510(k) Summary                                                                                          | accessdata.fda.gov/cdrh_docs/pdf20/K200667.pdf                                          | Electronic database | Kaushal Solanki       | 2020        | Technical report                   | Los Angeles, California                       |
| Eyenuk Inc.                    | EyeArt              | Pivotal Evaluation of an Artificial Intelligence System for Autonomous Detection of Referrable and Vision-Threatening Diabetic Retinopathy                  | 10.1001/jama-networkopen.2021.34254                                                     | website             | Eli Ipp               | 2021        | JAMA Network Open                  | Eyenuk California                             |
| Eyenuk Inc.                    | EyeArt              | Diabetic Retinopathy Screening with Automated Retinal Image Analysis in a Primary Care Setting Improves Adherence to Ophthalmic Care                        | 10.1016/j.oret.2020.06.016                                                              | electronic database | James Liu             | 2022        | Ophthalmology Retina               | Washington University School of Medicine, USA |
| Coala Life AB                  | Coala Heart Monitor | Symptom-Ruled Real World Arrhythmic Recordings With an Internet Based System                                                                                | Abstract                                                                                | electronic database | Olsson                | 2018        | Circulation                        | Sturebadet Health Care, Stockholm, Sweden     |
| Coala Life AB                  | Coala Heart Monitor | Performance evaluation of dual vs. single lead automatic, real-world arrhythmic ECG recordings.                                                             | Conference                                                                              | electronic database | Olsson                | 2019        | Abstract, conference               | Sturebadet Health Care, Stockholm, Sweden     |
| Coala Life AB                  | Coala Heart Monitor | Traditional 510(k) Premarket Notification – Coala Heart Monitor- 510(k) Summary                                                                             | accessdata.fda.gov/cdrh_docs/pdf18/K182040.pdf                                          | Electronic database | Piere Bounaud         | 2019        | Technical report                   | San Diego, California                         |

| <b>Predictive ML algorithm</b> | <b>Product</b>      | <b>Publication</b>                                                                                                                               | <b>doi</b>                   | <b>source</b>       | <b>first author</b> | <b>year</b> | <b>source</b>                         | <b>center corresponding author</b>                               |
|--------------------------------|---------------------|--------------------------------------------------------------------------------------------------------------------------------------------------|------------------------------|---------------------|---------------------|-------------|---------------------------------------|------------------------------------------------------------------|
| Coala Life AB                  | Coala Heart Monitor | Evaluation of an enhanced, cloud-based AF-detection algorithm based on real-world arrhythmic                                                     | Conference                   | electronic database | Olsson              | 2019        | Abstract, conference                  | Sturebadet Health Care, Stockholm, Sweden                        |
| Coala Life AB                  | Coala Heart Monitor | Instant analysis of the ECG with a new digital technique during palpitations reduces symptoms, anxiety, depression, and increases HRQOL in women | Conference                   | electronic database | Carnlof             | 2019        | Abstract, conference                  | Sturebadet Health Care, Stockholm, Sweden                        |
| Coala Life AB                  | Coala Heart Monitor | Symptomatic palpitations causing anxiety in women, what are the underlying arrhythmias?                                                          | Conference                   | electronic database | Per Insulander      | 2019        | Abstract, conference                  | Institutet and Karolinska University Hospital, Stockholm, Sweden |
| Coala Life AB                  | Coala Heart Monitor | Device profile of the Coala Heart Monitor for remote monitoring of the heart rhythm: overview of its efficacy                                    | 10.1080/1743440.2020.1732814 | electronic database | Per Insulander      | 2020        | Expert Review of Medical Devices      | Institutet and Karolinska University Hospital, Stockholm, Sweden |
| Babylon Health Ltd             | Babylon             | A Comparison of Artificial Intelligence and Human Doctors for the Purpose of Triage and Diagnosis                                                | 10.3389/frai.2020.543405     | website             | Adam Baker          | 2020        | Frontiers in Artificial Intelligence  | Babylon Health                                                   |
| Babylon Health Ltd             | Babylon             | Improving the accuracy of medical diagnosis with causal machine learning                                                                         | 10.1038/s41467-020-17419-    | website             | Jonathan G. Richens | 2020        | Nature Communications                 | Babylon Health                                                   |
| Huma Therapeutics              | Huma                | Accelerometer-derived sleep onset timing and cardiovascular disease incidence: a UK Biobank cohort study                                         | 10.1093/ehjdh/ztab088        | website             | Shahram Nikbakhtian | 2021        | European Heart Journal Digital Health | Huma Therapeutics                                                |

| <b>Predictive ML algorithm</b> | <b>Product</b> | <b>Publication</b>                                                                                                                                                 | <b>doi</b>                                     | <b>source</b>       | <b>first author</b>  | <b>year</b> | <b>source</b>                         | <b>center corresponding author</b>                  |
|--------------------------------|----------------|--------------------------------------------------------------------------------------------------------------------------------------------------------------------|------------------------------------------------|---------------------|----------------------|-------------|---------------------------------------|-----------------------------------------------------|
| Huma Therapeutics              | Huma           | Development and Validation of Risk Scores for All-Cause Mortality for a Smartphone-Based “General Health Score” App: Prospective Cohort Study Using the UK Biobank | 10.2196/25655                                  | website             | Ashley K Clift       | 2021        | JMIR Mhealth Uhealth                  | Imperial College London                             |
| Huma Therapeutics              | Huma           | Development of an accessible 10-year Digital CARDioVAscular (DiCAVA) risk assessment: a UK Biobank study                                                           | 10.1093/ehjdh/ztab057                          | website             | Nikola Dolezalova    | 2021        | European Heart Journal Digital Health | Huma Therapeutics                                   |
| Huma Therapeutics              | Huma           | Implementation of a mHealth solution to remotely monitor patients on a cardiac surgical waiting list: service evaluation                                           | 10.1093/jamia/open/ooab053                     | website             | Bernard Dillon Obika | 2021        | JAMIA Open                            | Huma Therapeutics                                   |
| Huma Therapeutics              | Huma           | Development of Digitally Obtainable 10-Year Risk Scores for Depression and Anxiety in the General Population                                                       | 10.3389/fpsy.2021.689026                       | website             | Davide Morelli       | 2021        | Frontiers in Psychiatry               | Huma Therapeutics                                   |
| Huma Therapeutics              | Huma           | Traditional 510(k) Premarket Notification – Huma RPM- 510(k) Summary                                                                                               | accessdata.fda.gov/cdrh_docs/pdf23/K230214.pdf | Electronic database | Mani Shanmugham      | 2023        | Technical report                      | New York                                            |
| Skin Analytics Limited         | DERM           | Detection of Malignant Melanoma Using Artificial Intelligence: An Observational Study of Diagnostic Accuracy                                                       | 10.5826/dpc.1001a11                            | website             | Michael Phillips     | 2019        | Dermatology Practical & Conceptual    | Royal Perth Hospital                                |
| Skin Analytics Limited         | DERM           | Assessment of Accuracy of an Artificial Intelligence Algorithm to Detect Melanoma in Images of Skin Lesions                                                        | 10.1001/jamanetworkopen.2019.13436             | website             | Michael Phillips     | 2019        | JAMA Network Open                     | Harry Perkins Institute of Medical Research (Perth) |
| ResApp                         | ResApp Health  | Cough Sound Analysis Can Rapidly Diagnose Childhood Pneumonia                                                                                                      | 10.1007/s10439-013-0836-0                      | website             | Udantha R Abeyratne  | 2013        | Annals of Biomedical Engineering      | University of Queensland                            |

| <b>Predictive ML algorithm</b> | <b>Product</b> | <b>Publication</b>                                                                                                                                                                     | <b>doi</b>                 | <b>source</b> | <b>first author</b> | <b>year</b> | <b>source</b>                               | <b>center corresponding author</b> |
|--------------------------------|----------------|----------------------------------------------------------------------------------------------------------------------------------------------------------------------------------------|----------------------------|---------------|---------------------|-------------|---------------------------------------------|------------------------------------|
| ResApp                         | ResApp Health  | Automatic Identification of Wet and Dry Cough in Pediatric Patients with Respiratory Diseases                                                                                          | 10.1007/s10439-013-0741-6  | website       | Vinayak Swarnkar    | 2013        | Annals of Biomedical Engineering            | University of Queensland           |
| ResApp                         | ResApp Health  | Automatic cough segmentation from non-contact sound recordings in pediatric wards                                                                                                      | 10.1016/j.bspc.2015.05.001 | website       | Yusuf A Amrulloh    | 2015        | Biomedical Signal Processing and Control    | University of Queensland           |
| ResApp                         | ResApp Health  | Wavelet Augmented Cough Analysis for Rapid Childhood Pneumonia Diagnosis                                                                                                               | 10.1109/TBME.2014.2381214  | website       | Keegan Kosasih      | 2015        | IEEE Transactions on Biomedical Engineering | University of Queensland           |
| ResApp                         | ResApp Health  | Exhaustive mathematical analysis of simple clinical measurements for childhood pneumonia diagnosis                                                                                     | 10.1007/s12519-017-0019-4  | website       | Keegan Kosasih      | 2017        | World Journal of Pediatrics                 | University of Queensland           |
| ResApp                         | ResApp Health  | Automatic Croup Diagnosis Using Cough Sound Recognition                                                                                                                                | 10.1109/TBME.2018.2849502  | website       | Roneel V Sharan     | 2019        | IEEE Transactions on Biomedical Engineering | University of Queensland           |
| ResApp                         | ResApp Health  | A prospective multicentre study testing the diagnostic accuracy of an automated cough sound centred analytic system for the identification of common respiratory disorders in children | 10.1186/s12931-019-1046-6  | website       | Paul Porter         | 2019        | Respiratory Research                        | Curtin University                  |
| ResApp                         | ResApp Health  | Diagnosing Chronic Obstructive Airway Disease on a Smartphone Using Patient-Reported Symptoms and Cough Analysis: Diagnostic Accuracy Study                                            | 10.2196/24587              | website       | Paul Porter         | 2020        | JMIR Formative Research                     | Curtin University                  |

| <b>Predictive ML algorithm</b> | <b>Product</b> | <b>Publication</b>                                                                                                                           | <b>doi</b>                                     | <b>source</b>       | <b>first author</b> | <b>year</b> | <b>source</b>                       | <b>center corresponding author</b>          |
|--------------------------------|----------------|----------------------------------------------------------------------------------------------------------------------------------------------|------------------------------------------------|---------------------|---------------------|-------------|-------------------------------------|---------------------------------------------|
| ResApp                         | ResApp Health  | Diagnosing community-acquired pneumonia via a smartphone-based algorithm: a prospective cohort study in primary and acute-care consultations | 10.3399/BJGP.2020.0750                         | website             | Paul Porter         | 2021        | British Journal of General Practice | Curtin University                           |
| ResApp                         | ResApp Health  | Identifying acute exacerbations of chronic obstructive pulmonary disease using patient-reported symptoms and cough feature analysis          | 10.1038/s41746-021-00472-x                     | website             | Scott Claxton       | 2021        | npj Digital Medicine                | Joondalup Health Campus                     |
| ResApp                         | ResApp Health  | Traditional 510(k) Premarket Notification – SleepCheck Rx - 510(k) Summary                                                                   | accessdata.fda.gov/cdrh_docs/pdf21/K213360.pdf | Electronic database | Neroli Anderson     | 2022        | Technical report                    | Brisbane Queensland Australia               |
| MobileODT                      | AVEC           | Remote quality assurance in cervical cancer screening in low resource settings using a handheld smartphone-based colposcope                  | 10.1117/12.2086377                             | website             | Christophe Millien  | 2015        | Proceedings of SPIE                 | Hôpital Universitaire de Mirebalais (Haiti) |
| MobileODT                      | AVEC           | Mobile colposcopy in urban and underserved suburban areas in Baja California                                                                 | 10.1117/12.2218697                             | website             | Marta Madiedo       | 2016        | Proceedings of SPIE                 | Fronteras Unidas Pro-Salud (Mexico)         |
| MobileODT                      | AVEC           | MobileODT: a case study of a novel approach to an mHealth-based model of sustainable impact                                                  | 10.21037/mhealth.2016.03.10                    | website             | Jonah Mink          | 2016        | mHealth                             | MobileODT                                   |
| MobileODT                      | AVEC           | Real-Time Monitoring and Evaluation of a Visual-Based Cervical Cancer Screening Program Using a Decision Support Job Aid                     | 10.3390/diagnostics6020020                     | website             | Curtis W Peterson   | 2016        | diagnostics                         | MobileODT                                   |
| MobileODT                      | AVEC           | Measurement and evaluation of digital cervicography programs in two cervical cancer screening camps in East Africa                           | 10.1117/12.2252249                             | website             | Curtis W Peterson   | 2017        | Proceedings of SPIE                 | MobileODT                                   |
| MobileODT                      | AVEC           | Cloud-based processing of multi-spectral imaging data                                                                                        | 10.1117/12.2252189                             | website             | Amir S Bernat       | 2017        | Proceedings of SPIE                 | MobileODT                                   |
| MobileODT                      | AVEC           | Characterization of cervigram image sharpness using multiple self-referenced measurements and                                                | 10.1117/12.2292179                             | website             | Mayoore Jaiswal     | 2018        | Proceedings of SPIE                 | Intellectual Ventures                       |

| Predictive ML algorithm | Product    | Publication                                                                                                                                                                                                                 | doi                                                               | source  | first author   | year | source                                                                         | center corresponding author                     |
|-------------------------|------------|-----------------------------------------------------------------------------------------------------------------------------------------------------------------------------------------------------------------------------|-------------------------------------------------------------------|---------|----------------|------|--------------------------------------------------------------------------------|-------------------------------------------------|
|                         |            | random forest classifiers                                                                                                                                                                                                   |                                                                   |         |                |      |                                                                                | Laboratory                                      |
| MobileODT               | AVEC       | Portable, low-cost multispectral imaging system: design, development, validation, and utilization                                                                                                                           | 10.1117/1.JBO.23.12.121612                                        | website | Frank J Bolton | 2018 | Journal of Biomedical Optics                                                   | MobileODT                                       |
| MobileODT               | AVEC       | Low-Cost Instructional Apparatus to Improve Training for Cervical Cancer Screening and Prevention                                                                                                                           | 10.1097/AOG.0000000000003140                                      | website | Sonia Parra    | 2019 | Obstetrics & Gynecology                                                        | Rice University (Houston)                       |
| MobileODT               | AVEC       | Prospective cohort study examining cervical cancer screening methods in HIV-positive and HIV-negative Cambodian Women: a comparison of human papilloma virus testing, visualization with acetic acid and digital colposcopy | 10.1136/bmjopen-2018-026887                                       | website | Sovannara Thay | 2019 | Obstetrics & Gynecology                                                        | Sihanouk Hospital Center of Hope (Cambodia)     |
| MobileODT               | AVEC       | Introduction of Mobile Colposcopy as a Primary Screening Tool for Different Socioeconomic Populations in Urban India                                                                                                        | -                                                                 | website | Renuka Matti   | 2019 | Pan Asian Journal of Obstetrics & Gynecology                                   | Dr LH Hiranandani Hospital (Mumbai)             |
| SkinVision              | SkinVision | Real-time acquisition of quality verified nonstandardized color images for skin lesions risk assessment — A preliminary study                                                                                               | 10.1109/ICSTCC.2014.6982415                                       | author  | A Udrea        | 2014 | 18th International Conference on System Theory, Control and Computing (ICSTCC) | University Politehnica of Bucharest, SkinVision |
| SkinVision              | SkinVision | Accuracy of a smartphone application using fractal image analysis of pigmented moles compared to clinical diagnosis and histological result                                                                                 | <a href="https://doi.org/10.1111/jdv.12648">10.1111/jdv.12648</a> | website | T Maier        | 2014 | Journal of the European Academy of Dermatology and Venereology                 | University Hospital of Munich                   |



| <b>Predictive ML algorithm</b> | <b>Product</b>  | <b>Publication</b>                                                                                                                                           | <b>doi</b>                    | <b>source</b>       | <b>first author</b> | <b>year</b> | <b>source</b>                                                  | <b>center corresponding author</b>                           |
|--------------------------------|-----------------|--------------------------------------------------------------------------------------------------------------------------------------------------------------|-------------------------------|---------------------|---------------------|-------------|----------------------------------------------------------------|--------------------------------------------------------------|
| SkinVision                     | SkinVision      | mHealth App for Risk Assessment of Pigmented and Nonpigmented Skin Lesions-A Study on Sensitivity and Specificity in Detecting Malignancy                    | 10.1089/tmj.2016.0259         | website             | Monique Thissen     | 2017        | Telemedicine Journal and E-Health                              | Catharina Hospital (Eindhoven), MUMC+, Maastricht University |
| SkinVision                     | SkinVision      | Development of Smartphone Apps for Skin Cancer Risk Assessment: Progress and Promise                                                                         | 10.2196/13376                 | website             | Tiago M de Carvalho | 2019        | JMIR Dermatology                                               | Erasmus Medical Center (Rotterdam)                           |
| SkinVision                     | SkinVision      | Accuracy of a smartphone application for triage of skin lesions based on machine learning algorithms                                                         | 10.1111/jdv.15935             | website             | A Udrea             | 2020        | Journal of the European Academy of Dermatology and Venereology | University Politehnica of Bucharest, SkinVision              |
| SkinVision                     | SkinVision      | Validation of a Market-Approved Artificial Intelligence Mobile Health App for Skin Cancer Screening: A Prospective Multicenter Diagnostic Accuracy Study     | 10.1159/000520474             | electronic database | Sangers T           | 2022        | Dermatology                                                    | Erasmus Medical Center (Rotterdam)                           |
| SkinVision                     | SkinVision      | Views on mobile health apps for skin cancer screening in the general population: an in-depth qualitative exploration of perceived barriers and facilitators. | 10.1111/bjd.20441             | electronic database | Sangers T           | 2021        | Dermatology                                                    | Erasmus Medical Center (Rotterdam)                           |
| SkinVision                     | SkinVision      | FDA Executive Summary Reclassification Panel Meeting on Skin Lesion Analyzers                                                                                | fda.gov/media/160252/download | Electronic database | -                   | 2022        | Technical report / meeting                                     | -                                                            |
| SkinVision                     | SkinVision      | Artificial intelligence in mobile health for skin cancer diagnostics at home (AIM HIGH): a pilot feasibility study                                           | 10.1016/j.eclim.2023.102019   | electronic database | A Smak Gregoor      | 2023        | eClinicalMedicine Lancet                                       | Erasmus Medical Center (Rotterdam)                           |
| MinuteFul - kidney test        | Healthy.io Ltd. | Traditional 510(k) Premarket Notification – MinuteFul – kidney test - 510(k) Summary                                                                         | accessdata.fda.gov/cdrh_docs  | Electronic          | Ron Zohar           | 2022        | Technical report                                               | Tel Aviv, Israel                                             |

| Predictive ML algorithm               | Product                                              | Publication                                                                                                                                                  | doi                | source              | first author | year | source                | center corresponding author  |
|---------------------------------------|------------------------------------------------------|--------------------------------------------------------------------------------------------------------------------------------------------------------------|--------------------|---------------------|--------------|------|-----------------------|------------------------------|
|                                       |                                                      |                                                                                                                                                              | /pdf21/K210069.pdf | database            |              |      |                       |                              |
| Minute <span>ful</span> - kidney test | Healthy.io Ltd.                                      | Exploring Implementation of a Home-Based Test for Kidney Disease: A Feasibility Study                                                                        | -                  | electronic database | J. Gregoire  | 2023 | AMGA                  | Valley Medical Group         |
| Minute <span>ful</span> - kidney test | <a href="#">Healthy.io</a> Ltd.                      | Evaluating the feasibility and acceptability of home-based urinalysis for albumin-creatinine ratio with smartphone technology: A quality improvement project | 10.1111/jorc.12460 | electronic database | N Thomas     | 2023 | Journal of Renal Care | London South Bank University |
| Medical algorithms                    | DeepRhythmAI                                         | Traditional 510(k) Premarket Notification - DeepRhythmAI - 510(k) Summary                                                                                    | -                  | electronic database | -            | 2022 | Technical report      | -                            |
| IRNF App                              | Irregular Rhythm Notification Feature (IRNF) 2.0 App | Traditional 510(k) Premarket Notification - Irregular Rhythm Notification Feature (IRNF) 2.0 App - 510(k) Summary                                            | -                  | electronic database | -            | 2021 | Technical report      | -                            |
| IRNF App                              | Irregular Rhythm Notification Feature (IRNF) 2.0 App | Atrial Fibrillation Algorithms Clinical Validation Study                                                                                                     | -                  | electronic database | -            | 2022 | Technical report      | -                            |
| IRNF App                              | Irregular Rhythm Notification Feature                | Atrial Fibrillation Algorithms Clinical Validation Study - Study Protocol and Statistical Analysis Plan                                                      | -                  | electronic database | -            | 2021 | Technical report      | -                            |

| <b>Predictive ML algorithm</b> | <b>Product</b>    | <b>Publication</b> | <b>doi</b> | <b>source</b> | <b>first author</b> | <b>year</b> | <b>source</b> | <b>center corresponding author</b> |
|--------------------------------|-------------------|--------------------|------------|---------------|---------------------|-------------|---------------|------------------------------------|
|                                | (IRNF)<br>2.0 App |                    |            |               |                     |             |               |                                    |



| Phase 4: Development of the necessary software application |                                    | Phase 5: Impact assessment of the AI-model in combination with the software |  |  |                                    |                |            | Phase 6: Implementation and use of the AI-model with software in daily practice |  |  | Average score |       |
|------------------------------------------------------------|------------------------------------|-----------------------------------------------------------------------------|--|--|------------------------------------|----------------|------------|---------------------------------------------------------------------------------|--|--|---------------|-------|
| Explainability, transparency, design and information       | Required standards and regulations | Impact assessment                                                           |  |  | Health Technology Assessment (HTA) | Implementation | Monitoring | Education                                                                       |  |  |               |       |
|                                                            |                                    |                                                                             |  |  |                                    |                |            |                                                                                 |  |  |               |       |
|                                                            |                                    |                                                                             |  |  |                                    |                |            |                                                                                 |  |  |               | 18/42 |
|                                                            |                                    |                                                                             |  |  |                                    |                |            |                                                                                 |  |  |               | 3/42  |
|                                                            |                                    |                                                                             |  |  |                                    |                |            |                                                                                 |  |  |               | 16/42 |
|                                                            |                                    |                                                                             |  |  |                                    |                |            |                                                                                 |  |  |               | 27/42 |
|                                                            |                                    |                                                                             |  |  |                                    |                |            |                                                                                 |  |  |               | 13/48 |
|                                                            |                                    |                                                                             |  |  |                                    |                |            |                                                                                 |  |  |               | 35/48 |
|                                                            |                                    |                                                                             |  |  |                                    |                |            |                                                                                 |  |  |               | 4/42  |
|                                                            |                                    |                                                                             |  |  |                                    |                |            |                                                                                 |  |  |               | 4/42  |
|                                                            |                                    |                                                                             |  |  |                                    |                |            |                                                                                 |  |  |               | 26/48 |
|                                                            |                                    |                                                                             |  |  |                                    |                |            |                                                                                 |  |  |               | 36/48 |
|                                                            |                                    |                                                                             |  |  |                                    |                |            |                                                                                 |  |  |               | 18/48 |
|                                                            |                                    |                                                                             |  |  |                                    |                |            |                                                                                 |  |  |               | 35/48 |
|                                                            |                                    |                                                                             |  |  |                                    |                |            |                                                                                 |  |  |               | 26/42 |
|                                                            |                                    |                                                                             |  |  |                                    |                |            |                                                                                 |  |  |               | 0/42  |
|                                                            |                                    |                                                                             |  |  |                                    |                |            |                                                                                 |  |  |               | 26/42 |
|                                                            |                                    |                                                                             |  |  |                                    |                |            |                                                                                 |  |  |               | 37/42 |
|                                                            |                                    |                                                                             |  |  |                                    |                |            |                                                                                 |  |  |               | 19/48 |
|                                                            |                                    |                                                                             |  |  |                                    |                |            |                                                                                 |  |  |               | 24/42 |
|                                                            |                                    |                                                                             |  |  |                                    |                |            |                                                                                 |  |  |               | 4/48  |
|                                                            |                                    |                                                                             |  |  |                                    |                |            |                                                                                 |  |  |               | 4/48  |
|                                                            |                                    |                                                                             |  |  |                                    |                |            |                                                                                 |  |  |               | 20-48 |
|                                                            |                                    |                                                                             |  |  |                                    |                |            |                                                                                 |  |  |               | 22/48 |
|                                                            |                                    |                                                                             |  |  |                                    |                |            |                                                                                 |  |  |               | 28/48 |
|                                                            |                                    |                                                                             |  |  |                                    |                |            |                                                                                 |  |  |               | 14/48 |
|                                                            |                                    |                                                                             |  |  |                                    |                |            |                                                                                 |  |  |               | 28/48 |
|                                                            |                                    |                                                                             |  |  |                                    |                |            |                                                                                 |  |  |               | 10/48 |
|                                                            |                                    |                                                                             |  |  |                                    |                |            |                                                                                 |  |  |               | 4/48  |
|                                                            |                                    |                                                                             |  |  |                                    |                |            |                                                                                 |  |  |               | 27/48 |
|                                                            |                                    |                                                                             |  |  |                                    |                |            |                                                                                 |  |  |               | 11/48 |
|                                                            |                                    |                                                                             |  |  |                                    |                |            |                                                                                 |  |  |               | 35/48 |
|                                                            |                                    |                                                                             |  |  |                                    |                |            |                                                                                 |  |  |               | 4/48  |
|                                                            |                                    |                                                                             |  |  |                                    |                |            |                                                                                 |  |  |               | 4/48  |
|                                                            |                                    |                                                                             |  |  |                                    |                |            |                                                                                 |  |  |               | 13/48 |
|                                                            |                                    |                                                                             |  |  |                                    |                |            |                                                                                 |  |  |               | 13/48 |
|                                                            |                                    |                                                                             |  |  |                                    |                |            |                                                                                 |  |  |               | 15/48 |
|                                                            |                                    |                                                                             |  |  |                                    |                |            |                                                                                 |  |  |               | 22/48 |
|                                                            |                                    |                                                                             |  |  |                                    |                |            |                                                                                 |  |  |               | 8/48  |
|                                                            |                                    |                                                                             |  |  |                                    |                |            |                                                                                 |  |  |               | 4/48  |
|                                                            |                                    |                                                                             |  |  |                                    |                |            |                                                                                 |  |  |               | 25/48 |
|                                                            |                                    |                                                                             |  |  |                                    |                |            |                                                                                 |  |  |               | 5/48  |
|                                                            |                                    |                                                                             |  |  |                                    |                |            |                                                                                 |  |  |               | 20/48 |
|                                                            |                                    |                                                                             |  |  |                                    |                |            |                                                                                 |  |  |               | 8/48  |
|                                                            |                                    |                                                                             |  |  |                                    |                |            |                                                                                 |  |  |               | 8/48  |

forming availability scores.

Green indicates the publicly availability of evidence; solid green indicates the evidence is publicly available, and opaque green indicates that authors or owners indicated that information regarding the requirements was restricted. Orange indicates the evidence available partially covers the requirement; solid orange indicates the evidence is publicly available, and opaque yellow indicates that authors or owners indicated that information regarding the requirements was restricted.

IA Network Open
