# Supplementary material for: Availability of Evidence for Predictive Machine Learning Algorithms in Primary Care: A Systematic Review
Source: JAMA Netw Open. 2024 Sep 12;7(9):e2432990. doi: 10.1001/jamanetworkopen.2024.32990 (PMC11393722; doi:10.1001/jamanetworkopen.2024.32990)
Supplement: Supplement 2. — Data Sharing Statement [file jamanetwopen-e2432990-s002.pdf]

## Data Sharing Statement

Rakers. Availability of Evidence for Predictive Machine Learning Algorithms in Primary Care.  
*JAMA Netw Open*. Published September 12, 2024. doi:10.1001/jamanetworkopen.2024.32990

### Data

**Data available:** Yes

**Data types:** Data (not involving human participants)

**How to access data:** Data requests can be send to [m.m.rakers@lumc.nl](mailto:m.m.rakers@lumc.nl)

**When available:** With publication

### Supporting Documents

**Document types:** None

### Additional Information

**Who can access the data:** Anyone requesting the data

**Types of analyses:** Any purpose

**Mechanisms of data availability:** With investigator support
